# Supplementary material for: Effectiveness of mRNA COVID-19 vaccines against Omicron and Delta variants in a matched test-negative case–control study among US veterans
Source: PubMed Central journal article supplement — BMJ Open. 2022 Aug 2;12(8):e063935. doi: 10.1136/bmjopen-2022-063935 (PMC9352567; doi:10.1136/bmjopen-2022-063935), 2022-08-02
Supplement: bmjopen-2022-063935.draft_revisions.pdf [file bmjopen-2022-063935.draft_revisions.pdf]

# BMJ Open

BMJ Open is committed to open peer review. As part of this commitment we make the peer review history of every article we publish publicly available.

When an article is published we post the peer reviewers' comments and the authors' responses online. We also post the versions of the paper that were used during peer review. These are the versions that the peer review comments apply to.

The versions of the paper that follow are the versions that were submitted during the peer review process. They are not the versions of record or the final published versions. They should not be cited or distributed as the published version of this manuscript.

BMJ Open is an open access journal and the full, final, typeset and author-corrected version of record of the manuscript is available on our site with no access controls, subscription charges or pay-per-view fees (<http://bmjopen.bmj.com>).

If you have any questions on BMJ Open's open peer review process please email [info.bmjopen@bmj.com](mailto:info.bmjopen@bmj.com)

# BMJ Open

## Effectiveness of mRNA COVID-19 Vaccines against Omicron and Delta Variants among US Veterans

|                               |                                                                                                                                                                                                                                                                                                                                                                                                                                                                                                                                                                                                                                                                                                                                                                                                                                                                                                                                                                                                                                                                                                                                                                                                                                                                                                                    |
|-------------------------------|--------------------------------------------------------------------------------------------------------------------------------------------------------------------------------------------------------------------------------------------------------------------------------------------------------------------------------------------------------------------------------------------------------------------------------------------------------------------------------------------------------------------------------------------------------------------------------------------------------------------------------------------------------------------------------------------------------------------------------------------------------------------------------------------------------------------------------------------------------------------------------------------------------------------------------------------------------------------------------------------------------------------------------------------------------------------------------------------------------------------------------------------------------------------------------------------------------------------------------------------------------------------------------------------------------------------|
| Journal:                      | <i>BMJ Open</i>                                                                                                                                                                                                                                                                                                                                                                                                                                                                                                                                                                                                                                                                                                                                                                                                                                                                                                                                                                                                                                                                                                                                                                                                                                                                                                    |
| Manuscript ID                 | bmjopen-2022-063935                                                                                                                                                                                                                                                                                                                                                                                                                                                                                                                                                                                                                                                                                                                                                                                                                                                                                                                                                                                                                                                                                                                                                                                                                                                                                                |
| Article Type:                 | Original research                                                                                                                                                                                                                                                                                                                                                                                                                                                                                                                                                                                                                                                                                                                                                                                                                                                                                                                                                                                                                                                                                                                                                                                                                                                                                                  |
| Date Submitted by the Author: | 20-Apr-2022                                                                                                                                                                                                                                                                                                                                                                                                                                                                                                                                                                                                                                                                                                                                                                                                                                                                                                                                                                                                                                                                                                                                                                                                                                                                                                        |
| Complete List of Authors:     | <p>Young-Xu, Yinong; US Department of Veterans Affairs, White River Junction VA Medical Center; US Department of Veterans Affairs, White River Junction VA Medical Center</p> <p>Zwain, Gabrielle; US Department of Veterans Affairs, White River Junction VA Medical Center</p> <p>Izurieta, Hector S ; US Department of Veterans Affairs, White River Junction VA Medical Center</p> <p>Korves, Caroline; US Department of Veterans Affairs, White River Junction VA Medical Center</p> <p>Powell, Ethan; US Department of Veterans Affairs, White River Junction VA Medical Center</p> <p>Smith, Jeremy; US Department of Veterans Affairs, White River Junction VA Medical Center</p> <p>Balajee, Abirami; US Department of Veterans Affairs, White River Junction VA Medical Center</p> <p>Holodniy, Mark; US Department of Veterans Affairs, White River Junction VA Medical Center</p> <p>Beenhouwer, David; US Department of Veterans Affairs, White River Junction VA Medical Center</p> <p>Rodriguez-Barradas, Maria ; US Department of Veterans Affairs, White River Junction VA Medical Center</p> <p>Brown, Sheldon; US Department of Veterans Affairs, White River Junction VA Medical Center</p> <p>Marconi, Vincent; US Department of Veterans Affairs, White River Junction VA Medical Center</p> |
| Keywords:                     | Public health < INFECTIOUS DISEASES, Epidemiology < INFECTIOUS DISEASES, Immunology < NATURAL SCIENCE DISCIPLINES                                                                                                                                                                                                                                                                                                                                                                                                                                                                                                                                                                                                                                                                                                                                                                                                                                                                                                                                                                                                                                                                                                                                                                                                  |
|                               |                                                                                                                                                                                                                                                                                                                                                                                                                                                                                                                                                                                                                                                                                                                                                                                                                                                                                                                                                                                                                                                                                                                                                                                                                                                                                                                    |

SCHOLARONE™  
Manuscripts

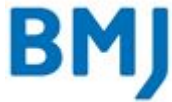

I, the Submitting Author has the right to grant and does grant on behalf of all authors of the Work (as defined in the below author licence), an exclusive licence and/or a non-exclusive licence for contributions from authors who are: i) UK Crown employees; ii) where BMJ has agreed a CC-BY licence shall apply, and/or iii) in accordance with the terms applicable for US Federal Government officers or employees acting as part of their official duties; on a worldwide, perpetual, irrevocable, royalty-free basis to BMJ Publishing Group Ltd ("BMJ") its licensees and where the relevant Journal is co-owned by BMJ to the co-owners of the Journal, to publish the Work in this journal and any other BMJ products and to exploit all rights, as set out in our [licence](#).

The Submitting Author accepts and understands that any supply made under these terms is made by BMJ to the Submitting Author unless you are acting as an employee on behalf of your employer or a postgraduate student of an affiliated institution which is paying any applicable article publishing charge ("APC") for Open Access articles. Where the Submitting Author wishes to make the Work available on an Open Access basis (and intends to pay the relevant APC), the terms of reuse of such Open Access shall be governed by a Creative Commons licence – details of these licences and which [Creative Commons](#) licence will apply to this Work are set out in our licence referred to above.

Other than as permitted in any relevant BMJ Author's Self Archiving Policies, I confirm this Work has not been accepted for publication elsewhere, is not being considered for publication elsewhere and does not duplicate material already published. I confirm all authors consent to publication of this Work and authorise the granting of this licence.

## Effectiveness of mRNA COVID-19 Vaccines against Omicron and Delta Variants among US Veterans

**Authors:** Yinong Young-Xu, MA, MS, ScD<sup>1,2</sup>, Gabrielle M. Zwain, BA<sup>1</sup>, Hector S. Izurieta, MD<sup>3</sup>, Caroline Korves, ScD<sup>1</sup>, Ethan I. Powell, BA<sup>1</sup>, Jeremy Smith, MPH<sup>1</sup>, Abirami S. Balajee MPH<sup>1</sup>, Mark Holodniy, MD<sup>4,5,6</sup>, David O. Beenhouwer, MD<sup>7,8</sup>, Maria C. Rodriguez-Barradas, MD<sup>9,10</sup>, Sheldon T. Brown, MD<sup>11,12</sup>, Vincent C. Marconi, MD<sup>13,14,15</sup>

### Author Institutions/Affiliations:

1. White River Junction Veterans Affairs Medical Center, 163 Veterans Drive, White River Junction, Vermont, 05009
2. Department of Psychiatry, Geisel School of Medicine at Dartmouth, 1 Rope Ferry Road, Hanover, New Hampshire, 03755
3. Food and Drug Administration (FDA), 10903 New Hampshire Avenue, Silver Springs, Maryland, 20993
4. Veterans Affairs Palo Alto Health Care System, 3801 Miranda Avenue, Palo Alto, California, 94304
5. Public Health Program Office, Department of Veterans Affairs, Washington, DC
6. Department of Medicine, Stanford University, 300 Pasteur Drive, Palo Alto, California, 94304
7. Veterans Affairs Greater Los Angeles Healthcare System, 11301 Wilshire Boulevard, Los Angeles, California, 90073

- 1  
2  
3 8. Department of Medicine, David Geffen School of Medicine at UCLA, 10833 Le Conte  
4 Ave, Los Angeles, California, 90095  
5  
6
- 7  
8 9. Michael E. DeBakey Veterans Affairs Medical Center, 2002 Holcombe Boulevard,  
9 Houston, Texas, 77030  
10  
11
- 12 10. Department of Medicine, Baylor College of Medicine, 1 Moursund Street, Houston,  
13 Texas, 77030  
14  
15
- 16 11. Department of Medicine, Icahn School of Medicine at Mount Sinai, 1 Gustave L. Levy  
17 Place, New York, New York, 10029  
18  
19
- 20 12. James J. Peters Veterans Affairs Medical Center, Bronx, 130 West Kingsbridge Road,  
21 New York, New York, 10468  
22  
23
- 24 13. Department of Medicine, Emory University School of Medicine, Atlanta, Georgia  
25  
26
- 27 14. Atlanta Veterans Affairs Medical Center, 1670 Clairmont Road, Decatur, GA 30033  
28  
29
- 30 15. Department of Global Health, Rollins School of Public Health, Emory University, 1518  
31 Clifton Road, Atlanta, Georgia, 30322  
32  
33

34  
35 **Corresponding Author:**

36 Yinong Young-Xu

37  
38 Veterans Affairs Medical Center

39  
40  
41 215 North Main Street

42  
43  
44 White River Junction, VT 05009

45  
46  
47 [Yinong.Young-Xu@va.gov](mailto:Yinong.Young-Xu@va.gov)

48  
49 [+1-802-295-9363 x6943](tel:+18022959363x6943)  
50  
51

52  
53  
54 **Word Count (2,830 no limit)**  
55  
56  
57

1  
2  
3 **Subtitle:** Covid-19 booster Vaccines among Veterans  
4  
5  
6

7  
8 **Key words:** COVID-19; SARS-CoV-2; Delta; Omicron; Veterans; mRNA vaccine; vaccine  
9  
10 effectiveness  
11

12 Summary box:  
13

- 14  
15 • Early reports show lower estimated vaccine effectiveness (VE) against Omicron infection  
16 for both 2-doses and 3-doses of COVID-19 vaccines. We estimated the VE against  
17 infection, hospitalization and death among US Veterans for either 2-doses or 3-doses of  
18 mRNA vaccines during periods of Omicron and Delta variant dominance.  
19  
20  
21  
22  
23  
24 • We found the mRNA vaccine boosters provided a level of protection against Omicron  
25 like that of 2-dose against Delta, with VE at 64%, 89%, and 94% against infection,  
26 hospitalization, and death, respectively.  
27  
28  
29  
30  
31  
32  
33  
34  
35  
36  
37  
38  
39  
40  
41  
42  
43  
44  
45  
46  
47  
48  
49  
50  
51  
52  
53  
54  
55  
56  
57  
58  
59  
60

1  
2  
3 **Abstract (words: 300)**  
4

5 **Objectives:** To estimate effectiveness of mRNA booster doses against 2-dose vaccinations  
6  
7 during periods of Delta and Omicron dominance.  
8  
9

10 **Design:** We conducted a matched test-negative case-control study to estimate VE of three and  
11  
12 two doses of mRNA vaccines against infection (regardless of symptoms). We then conducted a  
13  
14 matched case-control study to estimate VE against COVID-19-related hospitalization and death,  
15  
16 where controls were selected from the tested population (positive or negative).  
17  
18

19 **Setting:** Veterans Health Administration (VHA)  
20

21 **Participants:** Electronic health record data from 114640 Veterans who had a SARS-CoV-2 test  
22  
23 during November 2021-January 2022 were utilized. Patients were largely 65 years or older  
24  
25 (52%), male (88%), and non-Hispanic white (59%).  
26  
27

28 **Main outcome measures:** First positive result for a SARS-CoV-2 polymerase chain reaction  
29  
30 (PCR) or antigen test.  
31  
32

33 **Results:** Against infection, booster doses had higher VE - 64% (95% confidence interval [CI], 63  
34  
35 to 65) - than 2-dose VE (12%; 95% CI, 10 to 15) during the Omicron period. For the Delta  
36  
37 period, estimated VE against infection was 90% (95% CI, 88 to 92) among boosted vaccinees,  
38  
39 and was higher than VE among 2-dose vaccinees [54% (95% CI, 50 to 57)]. Against  
40  
41 hospitalization, booster dose VE was 89% (95% CI, 88 to 91) during Omicron and 94% (95%  
42  
43 CI, 90 to 96) during Delta; the 2-dose VE was 63% (95% CI, 58 to 67) during Omicron and 75%  
44  
45 (95% CI, 69 to 80) during Delta. Against death, estimated VE with a booster dose was 94%  
46  
47 (95% CI, 90 to 96) during Omicron and 96% (95% CI, 87 to 99) during Delta, while the 2-dose  
48  
49 VE was 77% (95% CI, 67 to 83) during Omicron and 92% (95% CI, 83 to 96) during Delta.  
50  
51  
52  
53  
54  
55  
56  
57  
58  
59  
60

1  
2  
3 **Conclusions:** A mRNA vaccine booster is more effective against infection, hospitalization, and  
4 death than 2-dose vaccination among an older male population with comorbidities.  
5  
6  
7  
8  
9  
10  
11  
12  
13  
14  
15  
16  
17  
18  
19  
20  
21  
22  
23  
24  
25  
26  
27  
28  
29  
30  
31  
32  
33  
34  
35  
36  
37  
38  
39  
40  
41  
42  
43  
44  
45  
46  
47  
48  
49  
50  
51  
52  
53  
54  
55  
56  
57  
58  
59  
60

For peer review only



## INTRODUCTION

We previously reported<sup>1,2</sup> the effectiveness of COVID-19 mRNA vaccines against infection, hospitalization, and mortality among Veterans Health Administration (VHA)-enrolled Veterans through September 2021, when the major circulating variants in the United States included Alpha, Beta, and Delta. We found estimated vaccine effectiveness to remain high in the first three months after vaccination and to decrease significantly after 5 months.<sup>2</sup> With the rise of the Omicron variant in December 2021-January 2022, we updated our estimates of vaccine effectiveness (VE) to measure continued effectiveness of both mRNA vaccines in a population including the entire U.S. and included the booster (3-dose) vaccination.

Starting in September 2021, the Centers for Disease Control and Prevention (CDC) Advisory Committee on Immunization Practices recommended a booster dose of COVID-19 vaccines to help increase protection against SARS-CoV-2.<sup>5,6,7,8,9</sup> As of early March 2022, the VHA had over 4 million fully vaccinated Veterans (2-dose of mRNA or 1-dose of Johnson & Johnson's Janssen COVID-19 vaccine) and over 1.6 million Veterans had received an mRNA booster.<sup>10</sup> As of March 2022, the VHA reported more than 613,000 COVID-19 cases and 21,309 confirmed deaths.<sup>10</sup>

Early reports<sup>11,12,13,15</sup> showed lower VEs against infection for the fully vaccinated (2-dose series) and even for those who received a booster (3-dose) during the Omicron period, but VE against hospitalization<sup>14</sup> remained high during both periods. These early reports on the Omicron variant were regional in the U.S., focused on one of the mRNA vaccines not both or were from outside the U.S. We sought to estimate VE against infection, hospitalization, and mortality for mRNA vaccines authorized in the U.S. (Pfizer-BioNTech and Moderna), for the fully vaccinated (2-dose) and those who received a booster (3-dose) of mRNA vaccines during the Delta and

1  
2  
3 Omicron dominant periods<sup>16</sup> in the US Veteran population, which includes individuals across the  
4 U.S. with underlying health conditions and diverse socio-economic backgrounds.  
5  
6

## 7 **METHODS**

8  
9  
10 We followed the Strengthening the Reporting of Observational Studies in Epidemiology  
11 reporting guideline.  
12  
13

### 14 *Data Source*

15  
16 We used electronic medical records and COVID-19 laboratory test data from the VHA Corporate  
17 Data Warehouse (CDW) to define infection irrespective of symptoms. The VHA CDW holds  
18 electronic medical records for about 9 million U.S. Veterans who use the VHA's network of  
19 1,293 health care facilities, including hospitals and outpatient clinics.<sup>29</sup> Using CDC variant  
20 tracking data<sup>16</sup>, we presumed Omicron SARS-CoV-2 infections those tested positive during  
21 January 2022 and Delta those tested positive in November 2021. Because December 2021  
22 represented an overlap of both variants, we excluded infections occurred during this month. As  
23 Medicare claims were available only up to August 2021, we used them to find COVID-19  
24 diagnoses, vaccinations, and hospitalizations prior to the study period to exclude patients with  
25 prior history of COVID-19 and to augment our vaccination records. Since this population of  
26 Veterans was largely over 65 years old, we supplemented CDW data with available Medicare  
27 data as Veterans may use Medicare to provide healthcare services even if we found frequent  
28 users of VHA. We used VHA CDW records to determine date of death.  
29  
30  
31  
32  
33  
34  
35  
36  
37  
38  
39  
40  
41  
42  
43  
44  
45  
46

### 47 *Study Design*

48  
49 To estimate VE against infection, we conducted a matched test negative case-control study  
50 (Table 1). The study population included Veterans ages  $\geq 18$  years residing in a US state or  
51 Washington, D.C., tested for SARS-CoV-2 by PCR (98%) or antigen (2%) testing at a VHA  
52  
53  
54  
55  
56  
57  
58  
59  
60

1  
2  
3 facility during the study period (November 2021 (Delta predominance) or January 2022  
4  
5 (Omicron predominance)). We required patients to have enrolment in the VHA and at least one  
6  
7 inpatient/outpatient encounter at a VHA facility during the 2 years before the study period and be  
8  
9 tested within the VA at an outpatient clinic or emergency room or within one day of  
10  
11 hospitalization. As we wanted to study a COVID-19 naïve population, we used VHA records to  
12  
13 exclude patients with a known prior history of COVID-19, defined as a VHA diagnosis code or  
14  
15 positive antigen/PCR lab test prior to the study period. For those with dual Medicare enrolment,  
16  
17 we also excluded patients with any claim with a COVID-19 diagnosis code prior to the study  
18  
19 period up until August 2021 (the latest available date for Medicare data). We excluded Johnson  
20  
21 & Johnson's Janssen vaccinees at the date of vaccination, thus excluding their subsequent tests  
22  
23 from the analysis. We also censored vaccinees with more than 3 doses of any vaccine at the date  
24  
25 of their fourth vaccination. Veterans who tested positive (regardless of symptoms) were  
26  
27 considered cases, and those who tested negative, controls. For patients with multiple tests, those  
28  
29 negative tests within 10 days of a positive test were excluded (positive tests were kept and  
30  
31 negative tests were excluded). We matched each case with up to 4 controls based on Health and  
32  
33 Human Service (HHS) geographic region and SARS-CoV-2 laboratory tests within 3 weeks of  
34  
35 the case specimen collection date as both are measures of local disease burden. Demographic  
36  
37 characteristics of the matched population were described by reporting the frequency and  
38  
39 proportion for categorical variables and the mean (SD) for continuous variables (Table1).  
40  
41 Standardized mean differences<sup>27</sup> were used to describe differences in characteristics between  
42  
43 cases and controls. For estimated VE against hospitalization and death, we utilized a matched  
44  
45 case-control design. Cases were those who tested positive and were hospitalized or died within  
46  
47 30 days of the positive COVID-19 test. Controls were those not hospitalized or who did not die  
48  
49  
50  
51  
52  
53  
54  
55  
56  
57  
58  
59  
60

1  
2  
3 within 30 days of their SARS-CoV-2 tests, irrespective of test results. Any patient with dual  
4 Medicare-VHA enrolment who had a claim for COVID-related hospitalization prior to the study  
5 period was already excluded, thus ineligible to be a control.  
6  
7

8  
9  
10 To better inform our interpretation of VE against hospitalization and mortality in the two time  
11 periods, we conducted a sub-analysis in which we assessed VE against COVID-related  
12 hospitalization and death among those already infected, restricting our hospitalization and  
13 mortality analysis to patients with a positive test. Cases were defined as before, and controls  
14 were those who were not hospitalized or who did not die within 30 days of a positive test. We  
15 also compared average length-of-stay (LOS) and rates of intensive care unit (ICU) admission  
16 among those hospitalized in the Delta and Omicron periods.  
17  
18  
19  
20  
21  
22  
23  
24  
25

### 26 27 *Exposure*

28 We defined 2-dose vaccination as receipt of two doses of an mRNA COVID-19 vaccine, and  
29 booster vaccination as receipt of a third doses of an mRNA vaccine (about 95% of mRNA 3<sup>rd</sup>  
30 doses occurred approximately six months after a 2<sup>nd</sup> dose). We designated exposure to the two-  
31 dose regimen or a booster from 14 days following vaccination, excluding events in days 0-13.  
32  
33  
34  
35  
36  
37  
38  
39 We designated patients as unvaccinated if they had no record of vaccination in either VHA CDW  
40 or in Medicare.  
41  
42

### 43 *Statistical Analysis*

44 We used conditional logistic regression to calculate odds ratios (ORs) with 95% confidence  
45 intervals (CI) for the association between positive SARS-CoV-2 testing and 2 or 3 doses of  
46 mRNA COVID-19 vaccine during Delta and Omicron periods. In the model, we included  
47 number of mRNA vaccine doses (2 or 3) as the primary explanatory variable, an indicator  
48 variable for SARS-CoV-2 presumed variant (Delta or Omicron) based on test date, and their  
49  
50  
51  
52  
53  
54  
55  
56  
57  
58  
59  
60

1  
2  
3 interaction terms. We estimated the association between SARS-CoV-2 infections and number of  
4 mRNA vaccine doses by the OR, adjusting for age (continuous), race, rurality, VHA benefits  
5 priority, and comorbid conditions (cancer, congestive heart failure, hypertension,  
6 immunocompromising conditions, obesity, and diabetes). Confounders were determined based  
7 on prior study<sup>1,2</sup> and known factors associated with SARS-CoV-2<sup>28</sup>. We also used conditional  
8 logistic regression to analyze VE against hospitalizations and death.  
9

10  
11  
12 Severity of disease was determined by average length of stay (LOS) in days between admission  
13 date and discharge date for overall COVID-19-related hospitalizations and average LOS in an  
14 intensive care unit (ICU) during a hospitalization related to COVID-19.  
15

16  
17  
18 All tests were two-tailed, and we chose 0.05 as the level of statistical significance. We performed  
19 data analysis using SAS 9.4 (SAS Institute, Cary, North Carolina).  
20  
21

## 22 **Patient and public involvement**

23  
24  
25 Patients or the public were not involved in the design, or conduct, or reporting, or dissemination  
26 plans of our research.  
27

## 28 **RESULTS**

### 29 *Study Population*

30  
31  
32 In November 2021 (Delta period) there were 4,134 positive SARS-CoV-2 tests (cases), and  
33 170,316 negative tests (controls). After matching, 4,134 cases and 16,536 controls remained (see  
34 Table 1 for baseline characteristics and Figure 1 for attrition); 2,300 (56%) cases and 3,951  
35 (24%) controls were unvaccinated at the time of testing. In January 2022 (Omicron period) there  
36 were 32,983 positive tests (cases) and 263,780 negative tests (controls). After matching, 32,983  
37 cases and 126,363 controls remained. At the time of testing, 13,153 (40%) cases and 29,110  
38  
39  
40  
41  
42  
43  
44  
45  
46  
47  
48  
49  
50  
51  
52  
53  
54  
55  
56  
57  
58  
59  
60

1  
2  
3 (23%) controls remained unvaccinated. During both periods, cases tended to be non-Hispanic  
4 white, have a lower CCI score and younger than controls. Patients included in this study were  
5  
6 largely 65 years or older (94447, 52%), male (158395, 88%), and non-Hispanic white (105437,  
7  
8 59%).  
9  
10  
11  
12  
13  
14  
15  
16  
17  
18  
19  
20  
21  
22  
23  
24  
25  
26  
27  
28  
29  
30  
31  
32  
33  
34  
35  
36  
37  
38  
39  
40  
41  
42  
43  
44  
45  
46  
47  
48  
49  
50  
51  
52  
53  
54  
55  
56  
57  
58  
59  
60

For peer review only

Table 1. Baseline Characteristics of Matched Study Subjects

|                                                                                                                                                                                                                                                                                                                                 | Delta       |                 |                  | Omicron      |                  |                  |
|---------------------------------------------------------------------------------------------------------------------------------------------------------------------------------------------------------------------------------------------------------------------------------------------------------------------------------|-------------|-----------------|------------------|--------------|------------------|------------------|
|                                                                                                                                                                                                                                                                                                                                 | Case (4134) | Control (16536) | SMD <sup>^</sup> | Case (32983) | Control (126363) | SMD <sup>^</sup> |
| Number of mRNA vaccines, No. (%)                                                                                                                                                                                                                                                                                                |             |                 |                  |              |                  |                  |
| 0                                                                                                                                                                                                                                                                                                                               | 2300 (56)   | 3951 (24)       | 68.6             | 13153 (40)   | 29110 (23)       | 36.9             |
| 2                                                                                                                                                                                                                                                                                                                               | 1627 (39)   | 8035 (49)       | 18.7             | 11983 (36%)  | 35400 (28%)      | 17.9             |
| 3                                                                                                                                                                                                                                                                                                                               | 141 (3)     | 4221 (26)       | 66.2             | 6960 (21)    | 58953 (47)       | 56.1             |
| Vaccine manufacturer, No. (%)                                                                                                                                                                                                                                                                                                   |             |                 |                  |              |                  |                  |
| Moderna                                                                                                                                                                                                                                                                                                                         | 1057 (26)   | 7120 (43)       | 37.5             | 9935 (30)    | 50921 (40)       | 21.4             |
| Pfizer-BioNTech                                                                                                                                                                                                                                                                                                                 | 777 (19)    | 5465 (33)       | 33.0             | 9890 (30)    | 46283 (37)       | 14.1             |
| No Vaccine Recorded                                                                                                                                                                                                                                                                                                             | 2300 (56)   | 3951 (24)       | 68.6             | 13153 (40)   | 29110 (23)       | 36.9             |
| Age, years, No. (%)                                                                                                                                                                                                                                                                                                             |             |                 |                  |              |                  |                  |
| 18 to 44                                                                                                                                                                                                                                                                                                                        | 904 (22)    | 114 (1)         | 71.0             | 7828 (24%)   | 8966 (7)         | 47.4             |
| 45 to 64                                                                                                                                                                                                                                                                                                                        | 1417 (34)   | 6091 (37)       | 5.3              | 12884 (39)   | 47365 (37)       | 3.2              |
| 65 to 74                                                                                                                                                                                                                                                                                                                        | 1110 (27)   | 6381 (39)       | 25.2             | 7738 (23)    | 41715 (33)       | 21.3             |
| 75 to 84                                                                                                                                                                                                                                                                                                                        | 537 (13)    | 2871 (17)       | 12.2             | 3584 (11)    | 21345 (17)       | 17.5             |
| 85+                                                                                                                                                                                                                                                                                                                             | 166 (4)     | 1079 (7)        | 11.2             | 949 (3%)     | 6972 (6)         | 13.2             |
| Race, No. (%)                                                                                                                                                                                                                                                                                                                   |             |                 |                  |              |                  |                  |
| Black                                                                                                                                                                                                                                                                                                                           | 494 (12)    | 4636 (28)       | 41.1             | 8523 (26)    | 37049 (29)       | 7.8              |
| Hispanic                                                                                                                                                                                                                                                                                                                        | 193 (5)     | 601 (4)         | 5.2              | 1973 (6)     | 7425 (6)         | 0.4              |
| White                                                                                                                                                                                                                                                                                                                           | 3193 (77)   | 10139 (61)      | 35.0             | 20038 (61)   | 72067 (57)       | 7.6              |
| other                                                                                                                                                                                                                                                                                                                           | 254 (6)     | 1160 (7)        | 3.5              | 2449 (7)     | 9822 (8)         | 1.3              |
| Sex, No. (%)                                                                                                                                                                                                                                                                                                                    |             |                 |                  |              |                  |                  |
| Female                                                                                                                                                                                                                                                                                                                          | 420 (10)    | 1656 (10)       | 0.5              | 4419 (13)    | 15126 (12)       | 4.3              |
| Male                                                                                                                                                                                                                                                                                                                            | 3714 (90)   | 14880 (90)      | 0.5              | 28564 (87)   | 111237 (88)      | 4.3              |
| Quan's CCI                                                                                                                                                                                                                                                                                                                      |             |                 |                  |              |                  |                  |
| Mean (SD)                                                                                                                                                                                                                                                                                                                       | 0.8 (1.5)   | 1.6 (2.1)       | 44.2             | 0.8 (1.5)    | 1.3 (1.9)        | 31.8             |
| Median (Q1-Q3)                                                                                                                                                                                                                                                                                                                  | 0 (0-1)     | 1 (0-2)         |                  | 0 (0-1)      | 1 (0-2)          |                  |
| Abbreviations: Quan's CCI, Charlson comorbidity index, Quan's version <sup>26</sup><br>See Supplemental Table 1 (Young-Xu et al.) <sup>1</sup> for definitions of variables in this table<br><sup>^</sup> Standardized mean difference of 10 or greater was used to identify imbalance between cases and controls <sup>27</sup> |             |                 |                  |              |                  |                  |

### *Vaccine Effectiveness against infection*

For those with 2-dose mRNA vaccine, VE was 54% (95% CI, 50 to 57) for Delta and 12% (95% CI, 10 to 15) for Omicron. VE for those who received an mRNA vaccine booster was 90% (95% CI, 88 to 92) in the Delta period and 64% (95% CI, 63 to 65) in the Omicron period (Table 2).

For the Delta period, the median time from the 2<sup>nd</sup> dose to the SARS-CoV-2 test date was 241 days (note: 6 months were suggested in the FDA guideline regarding a booster) and 35 days from the 3<sup>rd</sup> dose. As is expected this median time from 2<sup>nd</sup> dose of vaccination increased for the Omicron period to 289 days and 72 days from the 3<sup>rd</sup> dose.

Table 2. Estimated Vaccine Effectiveness Against Laboratory Confirmed SARS-CoV-2 Infection by Dose and Variant

| Variant                                                                                                                                                                                                                                                                                                                                         | VE (95% CI)  | VE Interval (14+ days after vaccination) |
|-------------------------------------------------------------------------------------------------------------------------------------------------------------------------------------------------------------------------------------------------------------------------------------------------------------------------------------------------|--------------|------------------------------------------|
| Omicron                                                                                                                                                                                                                                                                                                                                         | 12% (10, 15) | 2 <sup>nd</sup> dose                     |
| Omicron                                                                                                                                                                                                                                                                                                                                         | 64% (63, 65) | 3 <sup>rd</sup> dose                     |
| Delta                                                                                                                                                                                                                                                                                                                                           | 54% (50, 57) | 2 <sup>nd</sup> dose                     |
| Delta                                                                                                                                                                                                                                                                                                                                           | 90% (88, 92) | 3 <sup>rd</sup> dose                     |
| Above numbers exclude Johnson & Johnson's Janssen vaccines as of the date of the Johnson & Johnson's Janssen vaccine. 2 <sup>nd</sup> and 3 <sup>rd</sup> doses are for mRNA vaccines compared to no vaccination in the indicated period beginning 14 days after vaccination. Tests occurring in 0-13 days after vaccination were excluded.     |              |                                          |
| Cases and controls were matched 1:4 on HHS region and date. The adjusted variables include the following: age (continuous), body mass index, cancer, congestive heart failure, chronic kidney disease, chronic obstructive pulmonary disease, diabetes mellitus, hypertension, immunocompromised, priority level, race/ethnicity, and rurality. |              |                                          |

### *Hospitalization and Death*

VE against COVID-related hospitalization for those who received 2-dose mRNA vaccine was 75% (95% CI, 69 to 80) in the Delta period and 63% (95% CI, 58 to 67) in the Omicron period (Table 3). VE against COVID-related hospitalization for those who received an mRNA vaccine booster was 94% (95% CI, 90 to 96) in the Delta period –higher than the 2-dose VE, and 89% (95% CI, 88 to 91) in the Omicron period – (Table 3). In a sub-analysis restricted to those with a



positive COVID-19 test in the study period, we evaluated VE against progression to hospitalization among the infected only, we found that VE for booster against COVID-related hospitalization was 53% (95% CI, 12 to 75) in the Delta period – not statistically different from the 2-dose VE, and 78% (95% CI, 74 to 81) in the Omicron period – almost twice higher than the 2-dose VE (Table S1). Among Omicron-associated hospitalizations (regardless of vaccination status), the length of stay (LOS) averaged 6.5 days (95% CI, 6.2 to 6.7 days), compared to 7.2 days (95% CI, 6.6 to 7.8) among Delta-associated hospitalizations. 11.3% (95% CI, 8.8 to 13.8%) of hospitalizations during the Delta period resulted in ICU admission; in contrast, 8.3% (95% CI, 7.2 to 9.5%) of COVID-related hospitalizations during the Omicron period resulted in ICU admission (Figure 2).

Table 3. Estimated Vaccine Effectiveness Against COVID-19-related Hospitalization and Death by Dose and Variant

| VE Interval (14+ days after vaccination)                                                                                                                                                                                                                                                                                                                                                       |                      | VE (95% CI)  |
|------------------------------------------------------------------------------------------------------------------------------------------------------------------------------------------------------------------------------------------------------------------------------------------------------------------------------------------------------------------------------------------------|----------------------|--------------|
| Hospitalization                                                                                                                                                                                                                                                                                                                                                                                |                      |              |
| Omicron                                                                                                                                                                                                                                                                                                                                                                                        | 2 <sup>nd</sup> dose | 63% (58, 67) |
| Omicron                                                                                                                                                                                                                                                                                                                                                                                        | 3 <sup>rd</sup> dose | 89% (88, 91) |
| Delta                                                                                                                                                                                                                                                                                                                                                                                          | 2 <sup>nd</sup> dose | 75% (69, 80) |
| Delta                                                                                                                                                                                                                                                                                                                                                                                          | 3 <sup>rd</sup> dose | 94% (90, 96) |
| Death                                                                                                                                                                                                                                                                                                                                                                                          |                      |              |
| Omicron                                                                                                                                                                                                                                                                                                                                                                                        | 2 <sup>nd</sup> dose | 77% (67, 83) |
| Omicron                                                                                                                                                                                                                                                                                                                                                                                        | 3 <sup>rd</sup> dose | 94% (90, 96) |
| Delta                                                                                                                                                                                                                                                                                                                                                                                          | 2 <sup>nd</sup> dose | 92% (83, 96) |
| Delta                                                                                                                                                                                                                                                                                                                                                                                          | 3 <sup>rd</sup> dose | 96% (87, 99) |
| Above numbers exclude Johnson & Johnson's Janssen vaccines as of the date of the Johnson & Johnson's Janssen vaccine. 2 <sup>nd</sup> and 3 <sup>rd</sup> doses are for mRNA vaccines compared to no vaccination in the indicated period beginning 14 days after vaccination. Tests occurring in 0-13 days after vaccination were excluded.                                                    |                      |              |
| Cases and controls were matched 1:4 (max) without replacement on HHS and lab test date within three weeks. The adjusted variables include the following: age (continuous), body mass index, cancer, congestive heart failure, chronic kidney disease, chronic obstructive pulmonary disease, diabetes mellitus, hypertension, immunocompromised, priority level, race/ethnicity, and rurality. |                      |              |

1  
2  
3  
4 For those who received 2 doses of mRNA vaccines, VE against death was 92% (95% CI, 85 to  
5  
6 97) during Delta period and 77% (95% CI, 67 to 83) during Omicron period. VE against death  
7  
8 for those who received an mRNA vaccine booster was 96% (95% CI, 87 to 99) – no difference  
9  
10 from the 2-dose VE - during the Delta period, and 94% (95% CI, 90 to 96) –higher than the 2-  
11  
12 dose VE - during the Omicron period.  
13  
14

## 15 16 **DISCUSSION**

17  
18 Our study shows that Veterans who received an mRNA vaccine booster were highly protected  
19  
20 against COVID-related outcomes, particularly hospitalization and death, during both the Delta  
21  
22 and Omicron periods. These findings largely align with other VE studies of  
23  
24 Omicron<sup>11,12,13,14,15,17</sup>. Also, among Veterans tested positive for COVID-19, irrespective of  
25  
26 vaccination, those infected during the Omicron period were less likely to be hospitalized and, if  
27  
28 hospitalized, had shorter lengths of stay and lower likelihood of ICU admission.  
29  
30  
31

32  
33 We found that the booster dose significantly increased protection against infection, regardless of  
34  
35 symptoms, providing 90% VE against Delta and 64% against Omicron (Table 2) than the 2-dose  
36  
37 regimen. These results were generally aligned with published findings. Early results from  
38  
39 Southern California<sup>12</sup> showed that booster doses improved VE against infection when compared  
40  
41 to 2-doses during both the Delta and Omicron periods. Similarly, a study from Israel focusing  
42  
43 specifically on the Pfizer mRNA vaccine during the Delta period, estimated that a booster  
44  
45 vaccination reduced the rate of confirmed infection as compared to those who did not receive a  
46  
47 booster as to bring the vaccine efficacy up to a that reported against the Alpha variant.<sup>18</sup>  
48  
49  
50

51  
52 Although we found moderate VE against hospitalization after 2-dose vaccination (Table 3), the  
53  
54 booster dose significantly improved VE against hospitalization during the Delta and Omicron  
55  
56  
57

1  
2  
3 periods. For hospitalization, the booster dose increased the VE from 75% to 94% against Delta  
4  
5 and from 63% to 89 % against Omicron. Estimated VE of the booster dose against mortality was  
6  
7 high during both Delta and Omicron periods: 94% for Omicron and 96% for Delta. These  
8  
9 estimates of high VE against mortality resembled the reduced risk of mortality reported  
10  
11 elsewhere in the U.S.<sup>20</sup>  
12  
13

14  
15 A study from South Africa that focused on two-doses of the Pfizer vaccine found an estimated  
16  
17 VE against hospitalization of 93% (95% CI, 90 to 94) during the Delta period and 70% (95% CI,  
18  
19 62 to 76) during the Omicron period.<sup>11</sup> While we found a similar drop in effectiveness from the  
20  
21 Delta to the Omicron period, our VE estimates were lower for both periods. Waning protection  
22  
23 over time and differences in populations may contribute to the disagreement in our findings. For  
24  
25 example, studies of hospitalized U.S. Veterans pre-dating the Omicron period showed an  
26  
27 estimated VE of 86.8% (95% CI, 80.4-91.1) for full vaccination (including mRNA and Johnson  
28  
29 & Johnson's Janssen),<sup>3</sup> 86.1% (95% CI, 77.7 to 91.3) for 2 doses of Moderna and 75.1% (95%  
30  
31 CI, 64.6 to 82.4) for 2 doses of Pfizer-BioNTech.<sup>4</sup>  
32  
33

34  
35 Our supplementary cases-only analysis showed that the booster vaccination was still highly  
36  
37 effective against hospitalization among vaccine breakthrough cases in both the Omicron and  
38  
39 Delta periods, with a higher point estimate for the Omicron period (Table S2). This is consistent  
40  
41 with a study from the U.K. showing reduced risk of hospitalization among those infected with  
42  
43 the Omicron variant compared to the Delta variant.<sup>30</sup>  
44  
45

46  
47 Our results highlight the value of booster doses for protection against infection and, more  
48  
49 importantly, against hospitalization and death. They also revealed distinctive features of the two  
50  
51 variants, and lower severity of illness for the Omicron variant as compared to the Delta variant.  
52  
53

## 54 **STRENGTHS AND LIMITATIONS**

55  
56  
57  
58  
59  
60

1  
2  
3 Strengths of this study include a large, diverse population and near real-time access to medical  
4 records. The VHA population offers insight into populations often underrepresented in US  
5 studies: racial minorities with a wide range of socio-economic backgrounds. Also, the VHA  
6 Veteran population is older (47% above 65),<sup>25</sup> sicker,<sup>24</sup> and predominantly male (90% male).<sup>25</sup>  
7  
8 Although data on symptomatic versus asymptomatic infection and reasons for SARS-CoV-2  
9 testing were infrequently recorded, in a random sample of Veterans who tested positive and had  
10 a detailed record, 26% reported no symptoms (Table S2). Possible misclassification of  
11 vaccination status and missing hospitalization records are of concerns because Veterans could go  
12 elsewhere for vaccination and hospitalization. For Veterans enrolled in Medicare, we checked  
13 records through August 2021 (latest available Medicare data) for COVID-19 vaccination,  
14 diagnoses, and related hospitalizations. We also limited the study population to Veterans who  
15 routinely sought care at the VHA to minimize misclassification. We assessed patient vaccination  
16 status as of November 2021 and January 2022. Other studies, including one of our own, have  
17 examined waning mRNA vaccine effectiveness against infection,<sup>2,21,22,23</sup> so we did not labor  
18 further on this topic. Nevertheless, Veterans with underlying conditions and health seeking  
19 behaviors may have been vaccinated earlier, thus increased their likelihood of having reduced  
20 immunity.

21  
22 Sequencing data were not available for individual SARS-CoV-2 laboratory tests, so we defined  
23 variant periods based on estimated variant proportions in the U.S. by the CDC. To reduce  
24 misclassification, we excluded December 2021 when Delta and Omicron variants shared  
25 dominance, analyzing November 2021 (when Delta was almost 100% dominant) and January  
26 2022 (when Omicron was 90%-100% dominant) separately.<sup>16</sup> In a future study we plan to use  
27 individual sequencing data after they become available in the VHA.

## CONCLUSION

In November 2021, the CDC expanded the booster recommendation to everyone 18 and older 6 months after their second mRNA dose or 2 months after receiving Johnson & Johnson's Janssen vaccine.<sup>7</sup> At that time, 2-dose mRNA vaccine effectiveness among our study population of VHA Veterans were 54%, 75%, and 92% against COVID-19 infection, hospitalization, and death due to the Delta variant, respectively. Our findings indicate that mRNA vaccine boosters were very effective against severe COVID-related outcomes during both Delta and Omicron periods. Moreover, the booster vaccination reduced the likelihood of hospitalization among infected patients. Overall, the mRNA vaccine boosters provided a level of protection against Omicron like that of 2-dose against Delta, with VE at 64%, 89%, and 94% against infection, hospitalization, and death, respectively. We can witness the impact of the mRNA vaccine boosters as case numbers continue to drop and the surge of the Omicron variant abates across the United States.

### **Ethics Approval Statement**

The study (Reference number: 1593089) was approved by the institutional review board (IRB) of the Department of Veterans Affairs Medical Center in White River Junction, Vermont, which waived the requirement for informed consent due to impracticality and low risk of the study.

**Contributorship:** YYX, HIS, CK, and VCM conceptualised and designed the study. YYX, EP, GZ, JS, AB, and CK conducted data analysis. All the authors reviewed titles, abstract, and full-text papers for eligibility. YYX and GZ drafted the paper, and all authors reviewed drafts and approved the final version. YYX is the guarantor of the paper.

**Disclaimer:** This article represents the authors' best judgement and should not bind or obligate the VA, the FDA, or any other institution.

**Competing interests:** YYX, EP, GZ, JS, AB, and CK acknowledge having received funding from Pfizer for other research projects other than this one.

**Funding:** This project was funded by both the U.S. Food and Drug Administration and the U.S. Department of Veterans Affairs Office of Rural Health.

**Data availability statement:** Data may be obtained from a third party and are not publicly available. The data that support the findings of this study are available upon reasonable request from the respective health data stewardship entities.

**REFERENCES**

1. Young-Xu Y, Korves C, Roberts J, et al. Coverage and effectiveness of mRNA COVID-19 vaccines among veterans: estimated from a test-negative case control study. *JAMA Netw Open* 2021;4(10):e2128391. Doi:10.1001/jamanetworkopen.2021.28391
2. Young-Xu Y, Zwain GM, Powell EI, et al. Estimated effectiveness of COVID-19 Messenger RNA vaccination against SARS-CoV-2 infection among older male veterans health administration enrollees, January to September 2021. *JAMA Netw Open* 2021;4(12):e2138975. Doi:10.1001/jamanetworkopen.2021.38975
3. Bajema KL, Dahl RM, Prill MM, et al. Effectiveness of COVID-19 mRNA vaccines against COVID-19-associated hospitalization—five Veterans Affairs Medical Centers, United States, February 1–August 6, 2021. *MMWR Morb Mortal Wkly Rep* 2021;70(37):1294-1299.
4. Bajema KL, Dahl RM, Evener SL, et al. Comparative effectiveness and antibody responses to Moderna and Pfizer-BioNTech COVID-19 vaccines among hospitalized Veterans—five Veterans Affairs Medical Centers, United States February 1–September 30, 2021. *MMWR Morb Mortal Wkly Rep* 2021;70(49):1700-1705
5. CDC statement on ACIP booster recommendations. News release. Centers for Disease Control and Prevention. September 24, 2021. Accessed February 24, 2022. <https://www.cdc.gov/media/releases/2021/p0924-booster-recommendations-.html>
6. CDC expands eligibility for COVID-19 booster shots. News release. October 21, 2021. Accessed February 24, 2022. <https://www.cdc.gov/media/releases/2021/p1021-covid-booster.html>

- 1  
2  
3 7. CDC expands COVID-19 booster recommendations. News release. November 29, 2021.  
4  
5 Accessed February 24, 2022. [https://www.cdc.gov/media/releases/2021/s1129-booster-](https://www.cdc.gov/media/releases/2021/s1129-booster-recommendations.html)  
6  
7 [recommendations.html](https://www.cdc.gov/media/releases/2021/s1129-booster-recommendations.html)  
8  
9
- 10 8. Media statement from CDC director Rochelle P. Walensky, MD, MPH, on signing the  
11  
12 Advisory Committee on Immunization Practices' recommendation for an additional dose  
13  
14 of an mRNA COVID-19 vaccine in moderately to severely immunocompromised people.  
15  
16 News Release. August 13, 2021. Accessed February 24, 2022.  
17  
18 <https://www.cdc.gov/media/releases/2021/s0813-additional-mRNA-mrna-dose.html>  
19  
20
- 21 9. COVID-19 vaccines booster shots who can get a booster shot. Accessed February 24,  
22  
23 2022. <https://www.cdc.gov/coronavirus/2019-ncov/vaccines/booster-shot.html>  
24  
25
- 26 10. Department of Veteran Affairs COVID-19 National Summary. Accessed March 16,  
27  
28 2022. <https://www.accesstocare.va.gov/Healthcare/COVID19NationalSummary>  
29  
30
- 31 11. Collie S, Champion J, Moultrie H, Bekker LG, Gray G. Effectiveness of BNT162b2  
32  
33 vaccine against Omicron variant in South Africa. *N Engl J Med*. 2022 Feb 3;386(5):494-  
34  
35 496. Doi:10.1056/NEJMc2119270. Epub 2021 Dec 29.  
36  
37
- 38 12. Tseng HF, Ackerson BK, Luo Y, et al. Effectiveness of mRNA-1273 against SARS-  
39  
40 CoV-2 omicron and delta variants. *Nature Medicine*. [https://doi.org/10.1038/s41591-022-](https://doi.org/10.1038/s41591-022-01753-y(2021))  
41  
42 [01753-y\(2021\)](https://doi.org/10.1038/s41591-022-01753-y(2021)).  
43  
44
- 45 13. Willett BJ, Grove J, MacLean OA, et al. The hyper-transmissible SARS-CoV-2 Omicron  
46  
47 variant exhibits significant antigenic change, vaccine escape and a switch in cell entry  
48  
49 mechanism. Preprint. medRxiv. Doi: 10.1101/2022.01.03.21268111.  
50  
51
- 52 14. Thompson MG, Natarajan K, Irving SA, et al. Effectiveness of a third dose of mRNA  
53  
54 vaccines against COVID-19-associated emergency department and urgent care  
55  
56  
57  
58  
59  
60



- 1  
2  
3 encounters and hospitalizations among adults during periods of Delta and Omicron  
4  
5 variant predominance—VISION Network, 10 states, August 2021-January 2022. *MMWR*  
6  
7 *Morb Mortal Wkly Rep.* 2022;71 (4):139–145.
- 8  
9  
10 15. Andrews N, Stowe J, Kirsebom F, et al. Effectiveness of COVID-19 vaccines against the  
11  
12 Omicron (B.1.1.529) variant of concern. *MedRx.* 14 Dec. 2021. Doi:  
13  
14 <https://doi.org/10.1101/2021.12.14.21267615>  
15  
16
- 17 16. Centers for Disease Control and Prevention. COVID Data Tracker Variant Proportions.  
18  
19 Accessed January 31, 2021. <https://covid.cdc.gov/covid-data-tracker/#variant-proportions>  
20  
21
- 22 17. SARS-CoV-2 variants of concern and variants under investigation in England. Technical  
23  
24 briefing 33. 23 Dec 2021.  
25  
26 [https://assets.publishing.service.gov.uk/government/uploads/system/uploads/attachment\\_](https://assets.publishing.service.gov.uk/government/uploads/system/uploads/attachment_data/file/1043807/technical-briefing-33.pdf)  
27  
28 [data/file/1043807/technical-briefing-33.pdf](https://assets.publishing.service.gov.uk/government/uploads/system/uploads/attachment_data/file/1043807/technical-briefing-33.pdf)  
29  
30
- 31 18. Bar-On YM, Goldberg Y, Mandel M, et al. Protection of BNT162b2 vaccine booster  
32  
33 against COVID-19 in Israel. *N Engl J Med.* 2021; 385:1393-1400. Doi:  
34  
35 10.1056/NEJMoa2114255  
36  
37
- 38 19. Bruxvoort KJ, Sy LS, Qian L, Ackerson B, et al. Effectiveness of mRNA-1273 against  
39  
40 delta, mu, and other emerging variants of SARS-CoV-2: test negative case-control study.  
41  
42 *BMJ* 2021; 375:e068848.  
43  
44
- 45 20. Johnson AG, Amin AB, Ali AR, et al. COVID-19 incidence and death rates among  
46  
47 unvaccinated and fully vaccinated adults with and without booster doses during periods  
48  
49 of Delta and Omicron variant emergence — 25 U.S. jurisdictions, April 4–December 25,  
50  
51 2021. *MMWR Morb Mortal Wkly Rep* 2022;71:132–138.  
52  
53  
54  
55  
56  
57  
58  
59  
60

- 1  
2  
3 21. Andrews N, Tessier E, Stowe J, et al. Duration of protection against mild and severe  
4 disease by COVID-19 vaccines. *N Engl J Med*. 2022;386:340-350. Doi:  
5  
6 10.1056/NEJMoa2115481.  
7  
8  
9  
10 22. Chemaitelly H, Tang P, Hasan M, et al. Waning of BNT162b2 vaccine protection against  
11 SARS-CoV-2 infection in Qatar. *N Engl J Med*. 2021; 385:e83. Doi:  
12  
13 10.1056/NEJMoa2114114.  
14  
15  
16  
17 23. Lin DY, Gu Y, Wheeler B, et al. Effectiveness of COVID-19 vaccines over a 9-Month  
18 period in North Carolina. *N Engl J Med*. 2022. DOI: 10.1056/NEJMoa2117128  
19  
20  
21  
22 24. W.H. Rogers, L.E. Kazis. Comparing the health status of VA and non-VA ambulatory  
23 patients: the Veterans' Health and Medical Outcomes Studies. *J Ambul Care Manage*, 27  
24 (3) (2004), pp. 249-262  
25  
26  
27  
28 25. U.S. Department of Veterans Affairs, National Center for Veterans Analysis and  
29 Statistics, Veteran Population. Accessed February 8, 2022.  
30  
31 [https://www.va.gov/vetdata/veteran\\_population.asp](https://www.va.gov/vetdata/veteran_population.asp).  
32  
33  
34  
35 26. Quan H, Sundararajan V, Halfon P, Fong A, Burnand B, Luthi JC, Saunders LD, Beck  
36 CA, Feasby TE, Ghali WA. Coding algorithms for defining comorbidities in ICD-9-CM  
37 and ICD-10 administrative data. *Med Care*. 2005 Nov;43(11):1130-9. doi:  
38  
39 10.1097/01.mlr.0000182534.19832.83.  
40  
41  
42  
43  
44 27. Austin PC. Balance diagnostics for comparing the distribution of baseline covariates  
45 between treatment groups in propensity-score matched samples. *Stat Med*.  
46  
47 2009;28(25):3083-3107. doi:10.1002/sim.3697.  
48  
49  
50  
51  
52  
53  
54  
55  
56  
57  
58  
59  
60

- 1  
2  
3 28. Izuriel HS, Graham DJ, Jiao Y, et al. Natural history of coronavirus disease 2019: risk  
4 factors for hospitalization and deaths among >26 million US Medicare beneficiaries. *J*  
5  
6 *Infect Dis.* 2021 Mar 29;223(6):945-956.  
7  
8  
9
- 10 29. U.S. Department of Veterans Affairs, Veterans Health Administration, accessed March  
11  
12 16, 2022. <https://www.va.gov/health/>  
13
- 14 30. Ferguson N, Ghani A, Hinsley W, Volz E. Report 50—hospitalisation risk for Omicron  
15 cases in England. Faculty of Medicine, Imperial College London.  
16  
17 [https://www.imperial.ac.uk/mrc-global-infectious-disease-analysis/covid-19/report-50-](https://www.imperial.ac.uk/mrc-global-infectious-disease-analysis/covid-19/report-50-severity-omicron/)  
18  
19 [severity-omicron/](https://www.imperial.ac.uk/mrc-global-infectious-disease-analysis/covid-19/report-50-severity-omicron/)  
20  
21  
22  
23  
24  
25  
26  
27  
28  
29  
30  
31  
32  
33  
34  
35  
36  
37  
38  
39  
40  
41  
42  
43  
44  
45  
46  
47  
48  
49  
50  
51  
52  
53  
54  
55  
56  
57  
58  
59  
60

Figure 1. Attrition

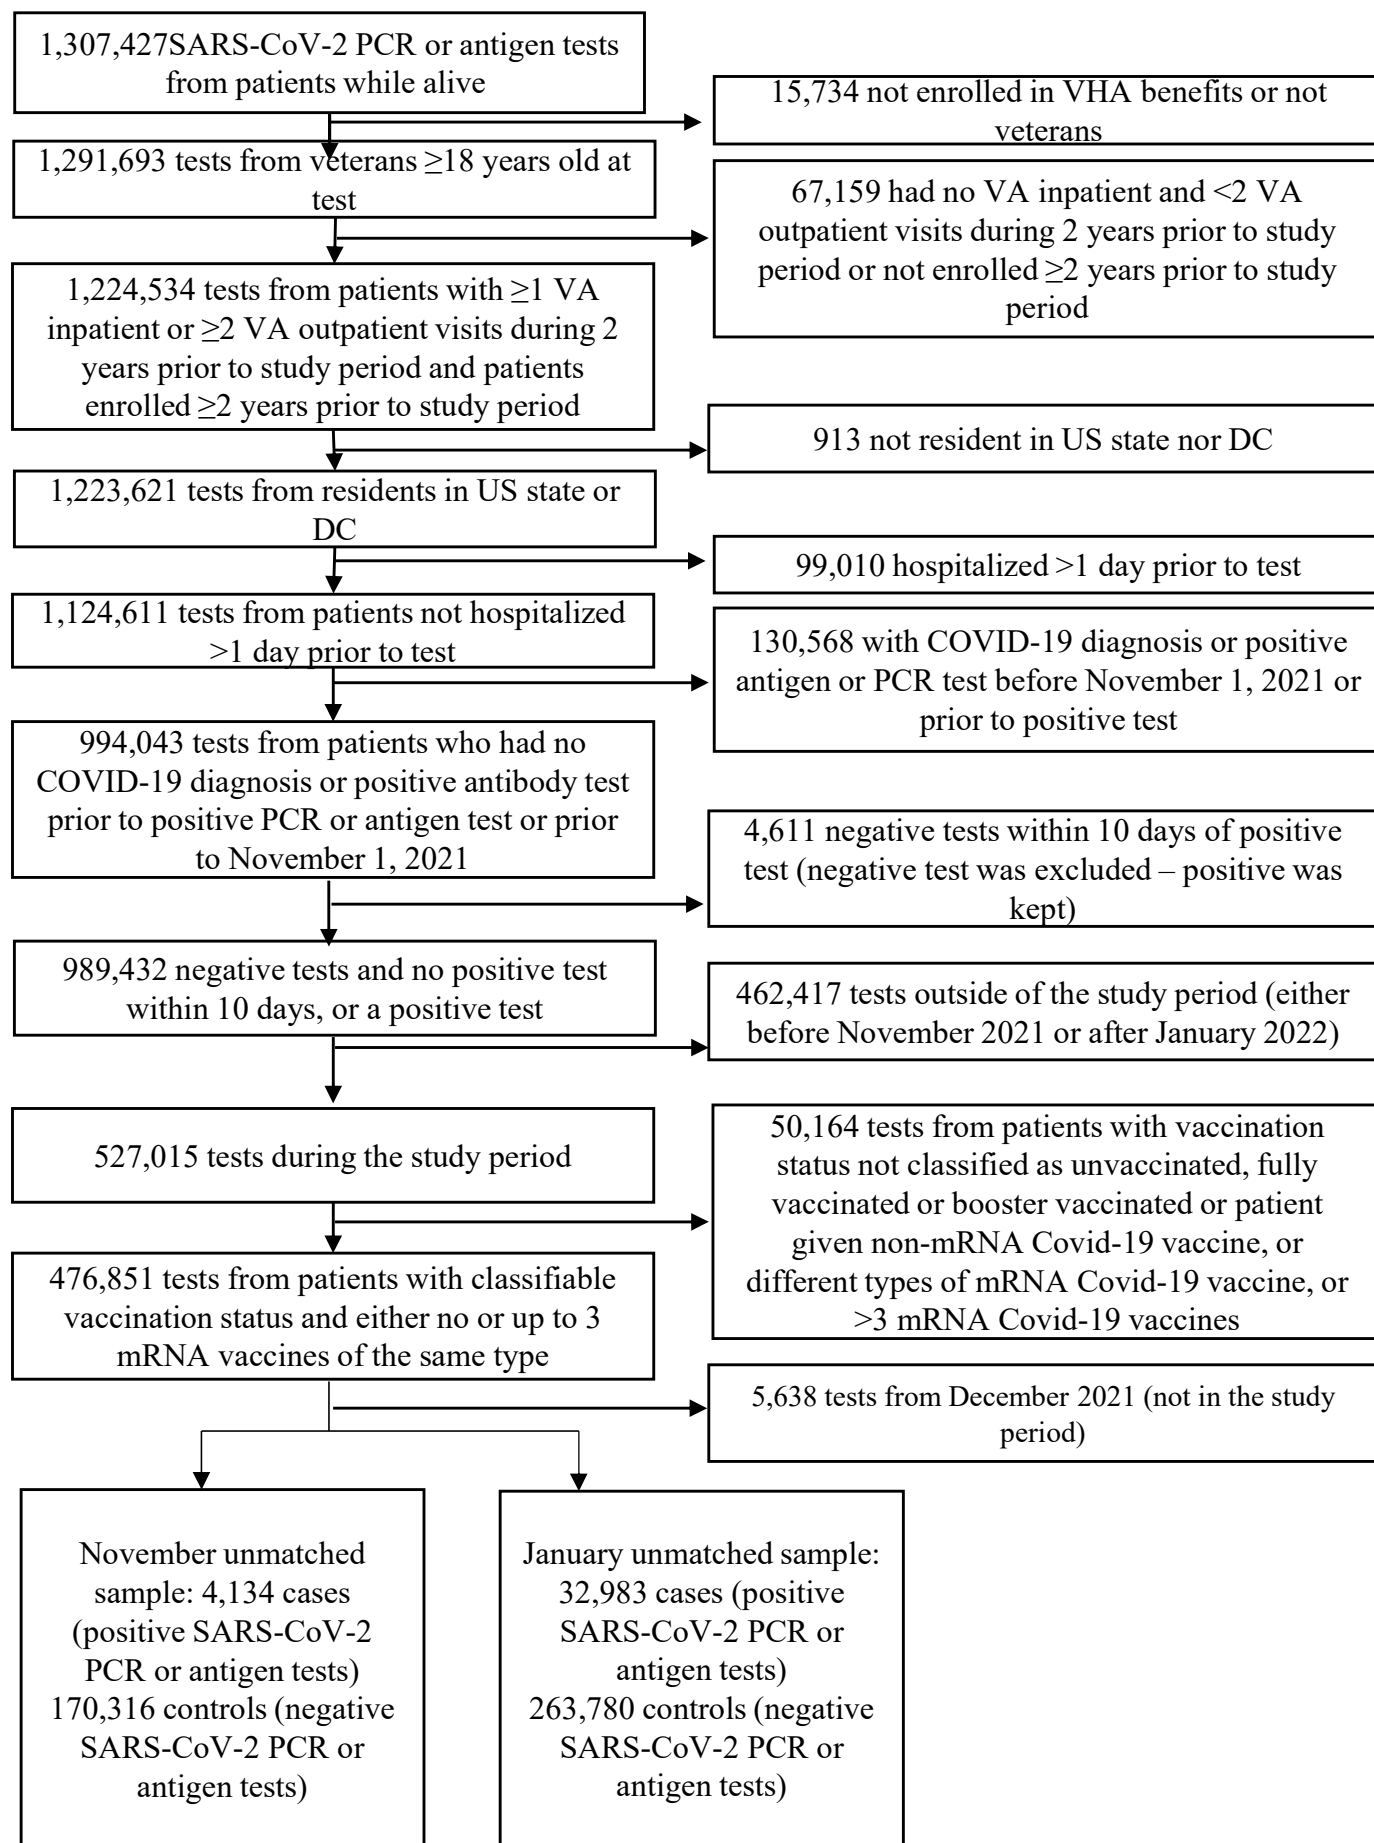

Figure 2. Average Hospital Length-of-Stay\* and Intensive Care Unit Use during Delta and Omicron Periods

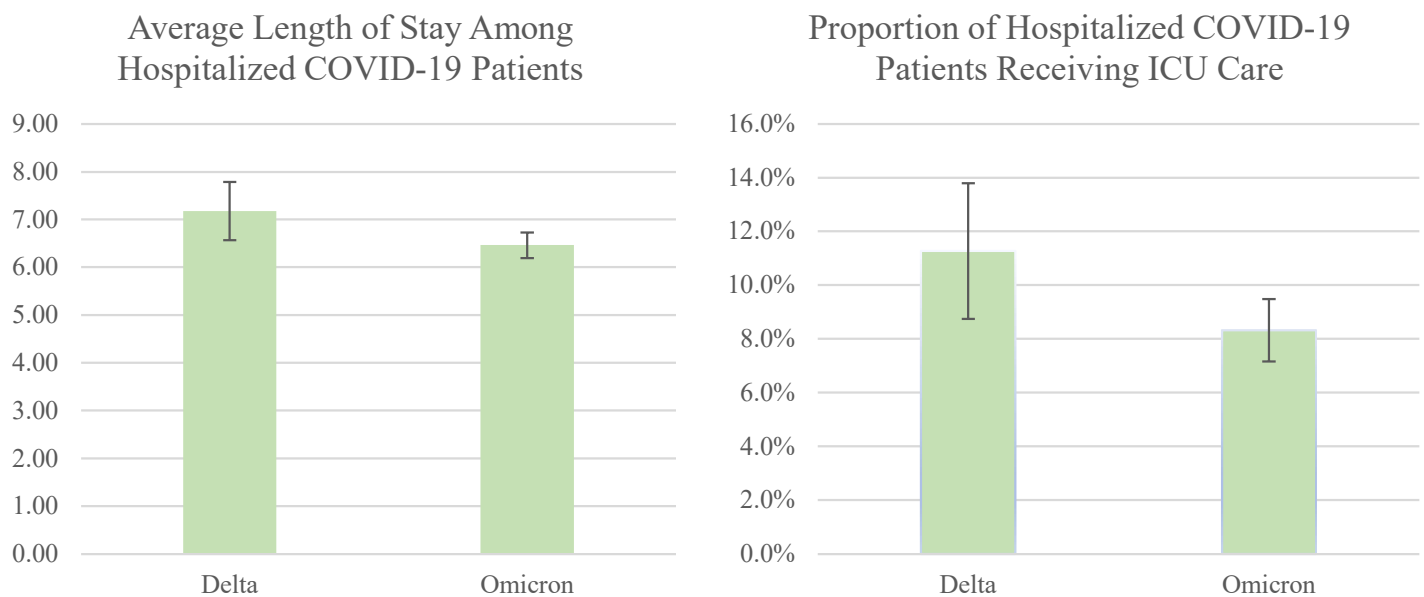

\* Number of days between admission and discharge dates

1  
2  
3 Supplemental Materials Legend  
4

- 5 1. Table S1. Estimated Vaccine Effectiveness Against COVID-19-related Hospitalization  
6 and Death Among Patients with a Positive Test  
7  
8  
9  
10 2. Table S2. Reasons for Testing and Symptoms  
11  
12  
13  
14  
15  
16  
17  
18  
19  
20  
21  
22  
23  
24  
25  
26  
27  
28  
29  
30  
31  
32  
33  
34  
35  
36  
37  
38  
39  
40  
41  
42  
43  
44  
45  
46  
47  
48  
49  
50  
51  
52  
53  
54  
55  
56  
57  
58  
59  
60

Table S1. Estimated Vaccine Effectiveness Against COVID-19-related Hospitalization and Death Among Patients with a Positive Test by Dose and Variant

| VE Interval (14+ days after vaccination)                                                                                                                                                                                                                                                                                                                                                              |                      | VE (95% CI)   |
|-------------------------------------------------------------------------------------------------------------------------------------------------------------------------------------------------------------------------------------------------------------------------------------------------------------------------------------------------------------------------------------------------------|----------------------|---------------|
| Hospitalization                                                                                                                                                                                                                                                                                                                                                                                       |                      |               |
| Omicron                                                                                                                                                                                                                                                                                                                                                                                               | 2 <sup>nd</sup> dose | 55% (49, 60)  |
| Omicron                                                                                                                                                                                                                                                                                                                                                                                               | 3 <sup>rd</sup> dose | 78% (74, 81)  |
| Delta                                                                                                                                                                                                                                                                                                                                                                                                 | 2 <sup>nd</sup> dose | 59% (48, 68)  |
| Delta                                                                                                                                                                                                                                                                                                                                                                                                 | 3 <sup>rd</sup> dose | 53% (12, 75)  |
| Death                                                                                                                                                                                                                                                                                                                                                                                                 |                      |               |
| Omicron                                                                                                                                                                                                                                                                                                                                                                                               | 2 <sup>nd</sup> dose | 61% (47, 72)  |
| Omicron                                                                                                                                                                                                                                                                                                                                                                                               | 3 <sup>rd</sup> dose | 85% (77, 91)  |
| Delta                                                                                                                                                                                                                                                                                                                                                                                                 | 2 <sup>nd</sup> dose | 81% (67, 89)  |
| Delta                                                                                                                                                                                                                                                                                                                                                                                                 | 3 <sup>rd</sup> dose | 62% (-25, 88) |
| <p>Above numbers exclude Johnson &amp; Johnson's Janssen vaccines as of the date of the Johnson &amp; Johnson's Janssen vaccine. 2<sup>nd</sup> and 3<sup>rd</sup> doses are for mRNA vaccines compared to no vaccination in the indicated period beginning 14 days after vaccination. Tests occurring in 0-13 days after vaccination were excluded.</p>                                              |                      |               |
| <p>Cases and controls were matched 1:4 (max) without replacement on HHS and lab test date within three weeks. The adjusted variables include the following: age (continuous), body mass index, cancer, congestive heart failure, chronic kidney disease, chronic obstructive pulmonary disease, diabetes mellitus, hypertension, immunocompromised, priority level, race/ethnicity, and rurality.</p> |                      |               |

Table S2. Reasons for Testing and Symptoms in A Random Sample of COVID-19 Tests

|                                                                                                                                      | Frequency | Percent |
|--------------------------------------------------------------------------------------------------------------------------------------|-----------|---------|
| Reason for Testing Recorded (n=1421)                                                                                                 |           |         |
| Exposure                                                                                                                             | 574       | 40%     |
| Screening                                                                                                                            | 847       | 60%     |
| Positive Tests (n=606)                                                                                                               |           |         |
| Asymptomatic                                                                                                                         | 160       | 26%     |
| Symptomatic                                                                                                                          | 346       | 57%     |
| Unknown                                                                                                                              | 100       | 17%     |
| Total Sample (n=10000)                                                                                                               |           |         |
| Records indicating asymptomatic/symptomatic/reason for testing                                                                       | 1958      | 20%     |
| Unknown                                                                                                                              | 8042      | 80%     |
| Exposure: ICD-10-CM code Z20.822; Screening: ICD-10-CM code Z11.52; up to 1 day before and including the date of the SARS-CoV-2 test |           |         |



STROBE Statement—Checklist of items that should be included in reports of *cohort studies*

|                           | Item No | Recommendation                                                                                                                                                                                                                                                                                                         | Page No             |
|---------------------------|---------|------------------------------------------------------------------------------------------------------------------------------------------------------------------------------------------------------------------------------------------------------------------------------------------------------------------------|---------------------|
| <b>Title and abstract</b> | 1       | (a) Indicate the study's design with a commonly used term in the title or the abstract<br>(b) Provide in the abstract an informative and balanced summary of what was done and what was found                                                                                                                          | 1,5                 |
| <b>Introduction</b>       |         |                                                                                                                                                                                                                                                                                                                        |                     |
| Background/rationale      | 2       | Explain the scientific background and rationale for the investigation being reported                                                                                                                                                                                                                                   | 7                   |
| Objectives                | 3       | State specific objectives, including any prespecified hypotheses                                                                                                                                                                                                                                                       | 7-8                 |
| <b>Methods</b>            |         |                                                                                                                                                                                                                                                                                                                        |                     |
| Study design              | 4       | Present key elements of study design early in the paper                                                                                                                                                                                                                                                                | 9                   |
| Setting                   | 5       | Describe the setting, locations, and relevant dates, including periods of recruitment, exposure, follow-up, and data collection                                                                                                                                                                                        | 8-9                 |
| Participants              | 6       | (a) Give the eligibility criteria, and the sources and methods of selection of participants. Describe methods of follow-up<br>(b) For matched studies, give matching criteria and number of exposed and unexposed                                                                                                      | 9-10, 9             |
| Variables                 | 7       | Clearly define all outcomes, exposures, predictors, potential confounders, and effect modifiers. Give diagnostic criteria, if applicable                                                                                                                                                                               | 8-10                |
| Data sources/measurement  | 8*      | For each variable of interest, give sources of data and details of methods of assessment (measurement). Describe comparability of assessment methods if there is more than one group                                                                                                                                   | 8                   |
| Bias                      | 9       | Describe any efforts to address potential sources of bias                                                                                                                                                                                                                                                              | 10-11               |
| Study size                | 10      | Explain how the study size was arrived at                                                                                                                                                                                                                                                                              |                     |
| Quantitative variables    | 11      | Explain how quantitative variables were handled in the analyses. If applicable, describe which groupings were chosen and why                                                                                                                                                                                           | 10-11               |
| Statistical methods       | 12      | (a) Describe all statistical methods, including those used to control for confounding<br>(b) Describe any methods used to examine subgroups and interactions<br>(c) Explain how missing data were addressed<br>(d) If applicable, explain how loss to follow-up was addressed<br>(e) Describe any sensitivity analyses | 10-11               |
| <b>Results</b>            |         |                                                                                                                                                                                                                                                                                                                        |                     |
| Participants              | 13*     | (a) Report numbers of individuals at each stage of study—eg numbers potentially eligible, examined for eligibility, confirmed eligible, included in the study, completing follow-up, and analysed<br>(b) Give reasons for non-participation at each stage<br>(c) Consider use of a flow diagram                        | 11-12, figure 1     |
| Descriptive data          | 14*     | (a) Give characteristics of study participants (eg demographic, clinical, social) and information on exposures and potential confounders<br>(b) Indicate number of participants with missing data for each variable of interest<br>(c) Summarise follow-up time (eg, average and total amount)                         | Table 1, page 12-13 |
| Outcome data              | 15*     | Report numbers of outcome events or summary measures over time                                                                                                                                                                                                                                                         | 12-13               |

1  
2  
3  
4  
5  
6  
7  
8  
9  
10  
11  
12  
13  
14  
15  
16  
17  
18  
19  
20  
21  
22  
23  
24  
25  
26  
27  
28  
29  
30  
31  
32  
33  
34  
35  
36  
37  
38  
39  
40  
41  
42  
43  
44  
45  
46  
47  
48  
49  
50  
51  
52  
53  
54  
55  
56  
57  
58  
59  
60

For peer review only

|    |                          |    |                                                                                                                                                                                                              |  |
|----|--------------------------|----|--------------------------------------------------------------------------------------------------------------------------------------------------------------------------------------------------------------|--|
| 1  | Main results             | 16 | (a) Give unadjusted estimates and, if applicable, confounder-adjusted estimates and their precision (eg, 95% confidence interval). Make clear which confounders were adjusted for and why they were included |  |
| 2  |                          |    | (b) Report category boundaries when continuous variables were categorized                                                                                                                                    |  |
| 3  |                          |    | (c) If relevant, consider translating estimates of relative risk into absolute risk for a meaningful time period                                                                                             |  |
| 4  |                          |    |                                                                                                                                                                                                              |  |
| 5  |                          |    |                                                                                                                                                                                                              |  |
| 6  |                          |    |                                                                                                                                                                                                              |  |
| 7  |                          |    |                                                                                                                                                                                                              |  |
| 8  |                          |    |                                                                                                                                                                                                              |  |
| 9  | Other analyses           | 17 | Report other analyses done—eg analyses of subgroups and interactions, and sensitivity analyses                                                                                                               |  |
| 10 |                          |    |                                                                                                                                                                                                              |  |
| 11 | <b>Discussion</b>        |    |                                                                                                                                                                                                              |  |
| 12 |                          |    |                                                                                                                                                                                                              |  |
| 13 | Key results              | 18 | Summarise key results with reference to study objectives                                                                                                                                                     |  |
| 14 | Limitations              | 19 | Discuss limitations of the study, taking into account sources of potential bias or imprecision. Discuss both direction and magnitude of any potential bias                                                   |  |
| 15 |                          |    |                                                                                                                                                                                                              |  |
| 16 | Interpretation           | 20 | Give a cautious overall interpretation of results considering objectives, limitations, multiplicity of analyses, results from similar studies, and other relevant evidence                                   |  |
| 17 |                          |    |                                                                                                                                                                                                              |  |
| 18 |                          |    |                                                                                                                                                                                                              |  |
| 19 | Generalisability         | 21 | Discuss the generalisability (external validity) of the study results                                                                                                                                        |  |
| 20 |                          |    |                                                                                                                                                                                                              |  |
| 21 | <b>Other information</b> |    |                                                                                                                                                                                                              |  |
| 22 | Funding                  | 22 | Give the source of funding and the role of the funders for the present study and, if applicable, for the original study on which the present article is based                                                |  |
| 23 |                          |    |                                                                                                                                                                                                              |  |
| 24 |                          |    |                                                                                                                                                                                                              |  |

25  
26 \*Give information separately for exposed and unexposed groups.

27  
28 **Note:** An Explanation and Elaboration article discusses each checklist item and gives methodological background and published examples of transparent reporting. The STROBE checklist is best used in conjunction with this article (freely available on the Web sites of PLoS Medicine at <http://www.plosmedicine.org/>, Annals of Internal Medicine at <http://www.annals.org/>, and Epidemiology at <http://www.epidem.com/>). Information on the STROBE Initiative is available at <http://www.strobe-statement.org>.

29  
30  
31  
32  
33  
34  
35  
36  
37  
38  
39  
40  
41  
42  
43  
44  
45  
46  
47  
48  
49  
50  
51  
52  
53  
54  
55  
56  
57  
58  
59  
60

# BMJ Open

## Effectiveness of mRNA COVID-19 Vaccines against Omicron and Delta Variants in a matched test-negative case-control study among US Veterans

|                                 |                                                                                                                                                                                                                                                                                                                                                                                                                                                                                                                                                                                                                                                                                                                                                                                                                                                                                                                                                                                                                                                                                                                                                                                                                                                                 |
|---------------------------------|-----------------------------------------------------------------------------------------------------------------------------------------------------------------------------------------------------------------------------------------------------------------------------------------------------------------------------------------------------------------------------------------------------------------------------------------------------------------------------------------------------------------------------------------------------------------------------------------------------------------------------------------------------------------------------------------------------------------------------------------------------------------------------------------------------------------------------------------------------------------------------------------------------------------------------------------------------------------------------------------------------------------------------------------------------------------------------------------------------------------------------------------------------------------------------------------------------------------------------------------------------------------|
| Journal:                        | <i>BMJ Open</i>                                                                                                                                                                                                                                                                                                                                                                                                                                                                                                                                                                                                                                                                                                                                                                                                                                                                                                                                                                                                                                                                                                                                                                                                                                                 |
| Manuscript ID                   | bmjopen-2022-063935.R1                                                                                                                                                                                                                                                                                                                                                                                                                                                                                                                                                                                                                                                                                                                                                                                                                                                                                                                                                                                                                                                                                                                                                                                                                                          |
| Article Type:                   | Original research                                                                                                                                                                                                                                                                                                                                                                                                                                                                                                                                                                                                                                                                                                                                                                                                                                                                                                                                                                                                                                                                                                                                                                                                                                               |
| Date Submitted by the Author:   | 21-Jun-2022                                                                                                                                                                                                                                                                                                                                                                                                                                                                                                                                                                                                                                                                                                                                                                                                                                                                                                                                                                                                                                                                                                                                                                                                                                                     |
| Complete List of Authors:       | Young-Xu, Yinong; US Department of Veterans Affairs, White River Junction VA Medical Center; US Department of Veterans Affairs, White River Junction VA Medical Center<br>Zwain, Gabrielle; US Department of Veterans Affairs, White River Junction VA Medical Center<br>Izurieta, Hector S ; US Department of Veterans Affairs, White River Junction VA Medical Center<br>Korves, Caroline; US Department of Veterans Affairs, White River Junction VA Medical Center<br>Powell, Ethan; US Department of Veterans Affairs, White River Junction VA Medical Center<br>Smith, Jeremy; US Department of Veterans Affairs, White River Junction VA Medical Center<br>Balajee, Abirami; US Department of Veterans Affairs, White River Junction VA Medical Center<br>Holodniy, Mark; US Department of Veterans Affairs, White River Junction VA Medical Center<br>Beenhouwer, David; US Department of Veterans Affairs, White River Junction VA Medical Center<br>Rodriguez-Barradas, Maria ; US Department of Veterans Affairs, White River Junction VA Medical Center<br>Brown, Sheldon; US Department of Veterans Affairs, White River Junction VA Medical Center<br>Marconi, Vincent; US Department of Veterans Affairs, White River Junction VA Medical Center |
| <b>Primary Subject Heading</b>: | Infectious diseases                                                                                                                                                                                                                                                                                                                                                                                                                                                                                                                                                                                                                                                                                                                                                                                                                                                                                                                                                                                                                                                                                                                                                                                                                                             |
| Secondary Subject Heading:      | Epidemiology, Immunology (including allergy)                                                                                                                                                                                                                                                                                                                                                                                                                                                                                                                                                                                                                                                                                                                                                                                                                                                                                                                                                                                                                                                                                                                                                                                                                    |
| Keywords:                       | Public health < INFECTIOUS DISEASES, Epidemiology < INFECTIOUS DISEASES, Immunology < NATURAL SCIENCE DISCIPLINES                                                                                                                                                                                                                                                                                                                                                                                                                                                                                                                                                                                                                                                                                                                                                                                                                                                                                                                                                                                                                                                                                                                                               |
|                                 |                                                                                                                                                                                                                                                                                                                                                                                                                                                                                                                                                                                                                                                                                                                                                                                                                                                                                                                                                                                                                                                                                                                                                                                                                                                                 |

1  
2  
3  
4  
5  
6  
7  
8  
9  
10  
11  
12  
13  
14  
15  
16  
17  
18  
19  
20  
21  
22  
23  
24  
25  
26  
27  
28  
29  
30  
31  
32  
33  
34  
35  
36  
37  
38  
39  
40  
41  
42  
43  
44  
45  
46  
47  
48  
49  
50  
51  
52  
53  
54  
55  
56  
57  
58  
59  
60

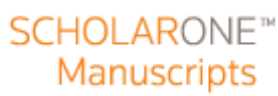



I, the Submitting Author has the right to grant and does grant on behalf of all authors of the Work (as defined in the below author licence), an exclusive licence and/or a non-exclusive licence for contributions from authors who are: i) UK Crown employees; ii) where BMJ has agreed a CC-BY licence shall apply, and/or iii) in accordance with the terms applicable for US Federal Government officers or employees acting as part of their official duties; on a worldwide, perpetual, irrevocable, royalty-free basis to BMJ Publishing Group Ltd ("BMJ") its licensees and where the relevant Journal is co-owned by BMJ to the co-owners of the Journal, to publish the Work in this journal and any other BMJ products and to exploit all rights, as set out in our [licence](#).

The Submitting Author accepts and understands that any supply made under these terms is made by BMJ to the Submitting Author unless you are acting as an employee on behalf of your employer or a postgraduate student of an affiliated institution which is paying any applicable article publishing charge ("APC") for Open Access articles. Where the Submitting Author wishes to make the Work available on an Open Access basis (and intends to pay the relevant APC), the terms of reuse of such Open Access shall be governed by a Creative Commons licence – details of these licences and which [Creative Commons](#) licence will apply to this Work are set out in our licence referred to above.

Other than as permitted in any relevant BMJ Author's Self Archiving Policies, I confirm this Work has not been accepted for publication elsewhere, is not being considered for publication elsewhere and does not duplicate material already published. I confirm all authors consent to publication of this Work and authorise the granting of this licence.

1  
2  
3  
4 1 **Effectiveness of mRNA COVID-19 Vaccines against Omicron and Delta Variants in a**  
5  
6 2 **matched test-negative case-control study among US Veterans**  
7  
8 3  
9

10  
11 4 **Authors:** Yinong Young-Xu, MA, MS, ScD<sup>1,2</sup>, Gabrielle M. Zwain, BA<sup>1</sup>, Hector S. Izurieta,  
12  
13 5 MD<sup>3</sup>, Caroline Korves, ScD<sup>1</sup>, Ethan I. Powell, BA<sup>1</sup>, Jeremy Smith, MPH<sup>1</sup>, Abirami S. Balajee  
14  
15 6 MPH<sup>1</sup>, Mark Holodniy, MD<sup>4,5,6</sup> David O. Beenhouwer, MD<sup>7,8</sup> Maria C. Rodriguez-Barradas,  
16  
17 7 MD<sup>9,10</sup>, Sheldon T. Brown, MD<sup>11,12</sup>, Vincent C. Marconi, MD<sup>13,14,15</sup>  
18  
19  
20 8

21  
22 9 **Author Institutions/Affiliations:**  
23

- 24  
25 10 1. White River Junction Veterans Affairs Medical Center, 163 Veterans Drive, White River  
26  
27 11 Junction, Vermont, 05009  
28  
29 12 2. Department of Psychiatry, Geisel School of Medicine at Dartmouth, 1 Rope Ferry Road,  
30  
31 13 Hanover, New Hampshire, 03755  
32  
33 14 3. Food and Drug Administration (FDA), 10903 New Hampshire Avenue, Silver Springs,  
34  
35 15 Maryland, 20993  
36  
37 16 4. Veterans Affairs Palo Alto Health Care System, 3801 Miranda Avenue, Palo Alto,  
38  
39 17 California, 94304  
40  
41 18 5. Public Health Program Office, Department of Veterans Affairs, Washington, DC  
42  
43 19 6. Department of Medicine, Stanford University, 300 Pasteur Drive, Palo Alto, California,  
44  
45 20 94304  
46  
47 21 7. Veterans Affairs Greater Los Angeles Healthcare System, 11301 Wilshire Boulevard,  
48  
49 22 Los Angeles, California, 90073  
50  
51  
52  
53  
54  
55  
56  
57  
58  
59  
60

- 1  
2  
3 23 8. Department of Medicine, David Geffen School of Medicine at UCLA, 10833 Le Conte  
4  
5 24 Ave, Los Angeles, California, 90095  
6  
7  
8 25 9. Michael E. DeBakey Veterans Affairs Medical Center, 2002 Holcombe Boulevard,  
9  
10 26 Houston, Texas, 77030  
11  
12 27 10. Department of Medicine, Baylor College of Medicine, 1 Moursund Street, Houston,  
13  
14 28 Texas, 77030  
15  
16  
17 29 11. Department of Medicine, Icahn School of Medicine at Mount Sinai, 1 Gustave L. Levy  
18  
19 30 Place, New York, New York, 10029  
20  
21  
22 31 12. James J. Peters Veterans Affairs Medical Center, Bronx, 130 West Kingsbridge Road,  
23  
24 32 New York, New York, 10468  
25  
26  
27 33 13. Department of Medicine, Emory University School of Medicine, Atlanta, Georgia  
28  
29 34 14. Atlanta Veterans Affairs Medical Center, 1670 Clairmont Road, Decatur, GA 30033  
30  
31 35 15. Department of Global Health, Rollins School of Public Health, Emory University, 1518  
32  
33 36 Clifton Road, Atlanta, Georgia, 30322  
34

35 37 **Corresponding Author:**

36 38 Yinong Young-Xu

37 39 Veterans Affairs Medical Center

38 40 215 North Main Street

39 41 White River Junction, VT 05009

40 42 [Yinong.Young-Xu@va.gov](mailto:Yinong.Young-Xu@va.gov)

41 43 [+1-802-295-9363 x6943](tel:+18022959363x6943)

42 44

43 45 **Word Count (3,126, 4,000 suggested limit)**



1  
2  
3 46  
4  
5  
6 47 **Acknowledgements of research support for the study:** This project was funded by both the  
7  
8 48 U.S. Food and Drug Administration and the U.S. Department of Veterans Affairs Office of Rural  
9  
10 49 Health.

11  
12 50 Yinong Young-Xu had full access to all the data in the study and takes responsibility for the  
13  
14 51 integrity of the data and the accuracy of the data analysis.  
15  
16  
17 52

18  
19 53 **Disclaimer:** This article represents the authors' best judgement and should not bind or obligate  
20  
21 54 the VA, the FDA, or any other institution.  
22  
23  
24 55

25  
26 56 **Conflict of Interest Declaration:** YYX, EP, GZ, JS, AB, and CK acknowledge having received  
27  
28 57 funding from Pfizer for other research projects other than this one.  
29  
30  
31 58

32  
33 59 **Subtitle:** Covid-19 booster Vaccines among Veterans  
34  
35  
36 60

37  
38 61 **Key words:** COVID-19; SARS-CoV-2; Delta; Omicron; Veterans; mRNA vaccine; vaccine  
39  
40 62 effectiveness  
41  
42  
43 63

44  
45 64 **Abstract (words now: 284, suggested limit:300)**

46  
47 65 **Objectives:** To estimate effectiveness of mRNA booster doses during periods of Delta and  
48  
49 66 Omicron variant dominance.  
50  
51  
52  
53  
54  
55  
56  
57  
58  
59  
60

1  
2  
3 67 **Design:** We conducted a matched test-negative case-control study to estimate VE of three and  
4  
5 68 two doses of mRNA vaccines against infection (regardless of symptoms), and against COVID-  
6  
7 69 19-related hospitalization and death.

8  
9  
10 70 **Setting:** Veterans Health Administration (VHA)

11  
12 71 **Participants:** We used electronic health record data from 114,640 Veterans who had a SARS-  
13  
14 72 CoV-2 test during November 2021-January 2022. Patients were largely 65 years or older (52%),  
15  
16 73 male (88%), and non-Hispanic white (59%).

17  
18 74 **Main outcome measures:** First positive result for a SARS-CoV-2 polymerase chain reaction  
19  
20 75 (PCR) or antigen test.

21  
22 76 **Results:** Against infection, booster doses had higher estimated VE –[64% (95% confidence  
23  
24 77 interval [CI], 63 to 65)] than 2-dose vaccination [12% (95% CI, 10 to 15)] during the Omicron  
25  
26 78 period. For the Delta period, VE against infection was 90% (95% CI, 88 to 92) among boosted  
27  
28 79 vaccinees, higher than VE among 2-dose vaccinees [54% (95% CI, 50 to 57)]. Against  
29  
30 80 hospitalization, booster dose VE was 89% (95% CI, 88 to 91) during Omicron and 94% (95%  
31  
32 81 CI, 90 to 96) during Delta; 2-dose VE was 63% (95% CI, 58 to 67) during Omicron and 75%  
33  
34 82 (95% CI, 69 to 80) during Delta. Against death, VE with a booster dose was 94% (95% CI, 90 to  
35  
36 83 96) during Omicron and 96% (95% CI, 87 to 99) during Delta.

37  
38 84 **Conclusions:** Among an older, mostly male, population with comorbidities, we found that an  
39  
40 85 mRNA vaccine booster was highly effective against infection, hospitalization, and death.

41  
42 86 Although the effectiveness of booster vaccination against infection was moderately higher  
43  
44 87 against Delta than against the Omicron SARS-CoV2 variant, effectiveness against severe disease  
45  
46 88 and death was similarly high against both variants.

47  
48  
49  
50  
51  
52  
53  
54 89

1  
2  
3 90 **Strengths and limitations of this study**  
4

- 5 91     ▪ This study included a large, diverse population of US Veterans and near real-time access  
6  
7  
8 92     to medical records  
9  
10 93     ▪ We used a test-negative case control approach to implicitly account for differences in  
11  
12 94     health seeking behaviors between cases and non-cases  
13  
14 95     ▪ By restricting participation to individuals who had used the VA health system in the past  
15  
16 96     two years and were also tested for COVID-19 in the VA system, we increased our  
17  
18 97     confidence that participants were active users of the VA health care system for  
19  
20 98     vaccination, medical office visits and hospitalizations. Nonetheless, some  
21  
22 99     misclassification of vaccination status and missing hospitalization records (for Veterans  
23  
24 100     seeking care outside of the VHA) was still possible  
25  
26  
27  
28 101     ▪ Symptoms and reason for SARS-CoV-2 testing were infrequently coded  
29  
30  
31 102     ▪ Sequencing data were not yet available for individual SARS-CoV-2 laboratory tests, so  
32  
33 103     we defined dominant circulation periods for each SARS-CoV2 variant of interest based  
34  
35 104     on CDC estimates of variant circulation in the U.S.  
36  
37  
38  
39  
40  
41 106

## 107 INTRODUCTION

108 In March 2020, the World Health Organization (WHO) declared coronavirus 19 (COVID-19),  
109 the disease caused by SARS-CoV-2, a pandemic.[1] By December 2020, the United States (U.S.)  
110 Food and Drug Administration (FDA) issued Emergency Use Authorizations (EUA) for two  
111 mRNA vaccines, based on the spike glycoprotein of the Wuhan strain of the SARS-CoV-2 virus,  
112 for the prevention of COVID-19. [2] [3]  
113 Despite early reports on the effectiveness of these vaccines [4] [5] [6] [7] [8, 9] and persistence  
114 of anti-SARS-Cov-2 antibodies following vaccination [10], frequent mutations have increasingly  
115 challenged the effectiveness of these vaccines [11] [12]. In July 2021, a new, more infectious  
116 variant, B.1.617.2 (Delta) became the most dominant variant in the United States [13]. In  
117 November 2021, another variant, B.1.1.529 (Omicron) was identified in the United States and  
118 became the dominant variant by mid-December. Although the Omicron variant is more  
119 infectious than Delta, it is considered less deadly [14]. However, the number of mutations in  
120 Omicron's spike protein, compared to the Wuhan strain, is larger than for Delta, raising  
121 questions regarding the effectiveness of the FDA-authorized vaccines against Omicron [15].  
122 We previously reported [9] [11] the effectiveness of COVID-19 mRNA vaccines against  
123 infection, hospitalization, and mortality among Veterans Health Administration (VHA)-enrolled  
124 Veterans through September 2021, when the major circulating variants in the United States  
125 included Alpha, Beta, and Delta. We found estimated vaccine effectiveness to remain high in the  
126 first three months after vaccination and to decrease significantly after 5 months [11]. With the  
127 rise of the Omicron variant in December 2021-January 2022 and the lengthening time from  
128 vaccination with the 2-dose primary series, we updated our estimates of vaccine effectiveness

1  
2  
3 129 (VE) to measure continued effectiveness of both mRNA vaccines in a population including the  
4  
5 130 entire U.S. and included VE estimates for the booster (3-dose) vaccination.  
6  
7

8 131 Starting in September 2021, the Centers for Disease Control and Prevention (CDC) Advisory  
9  
10 132 Committee on Immunization Practices recommended a booster dose of COVID-19 vaccine to  
11  
12 133 increase protection. [16] [17] As of early March 2022, the VHA had over 4 million fully  
13  
14 134 vaccinated Veterans (2-dose of mRNA or 1-dose of Johnson & Johnson's Janssen COVID-19  
15  
16 135 vaccine) and over 1.6 million Veterans had received an mRNA booster [18]. As of March 2022,  
17  
18 136 the VHA reported more than 613,000 COVID-19 cases and 21,309 confirmed deaths [18].  
19  
20  
21  
22

23 137 Early reports [19] [20] [21] [22] showed lower VEs against infection for the fully vaccinated (2-  
24  
25 138 dose series) and even for those who received a booster (3-dose) during the Omicron period, but  
26  
27 139 VE against hospitalization [23] remained high during both periods. These early reports on the  
28  
29 140 Omicron variant were regional in the U.S., focused on one of the mRNA vaccines not both or  
30  
31 141 were from outside the U.S. We sought to estimate VE against infection, hospitalization, and  
32  
33 142 mortality for mRNA vaccines authorized in the U.S. (Pfizer-BioNTech and Moderna), for the  
34  
35 143 fully vaccinated (2-dose) and those who received a booster (3-dose) of mRNA vaccines during  
36  
37 144 the Delta and Omicron dominant periods [13] in the US Veteran population, which includes  
38  
39 145 individuals across the U.S. with underlying health conditions and diverse socio-economic  
40  
41 146 backgrounds.  
42  
43  
44

## 45 147 **METHODS**

46  
47  
48 148 The study was approved by the institutional review board (IRB) of the Department of Veterans  
49  
50 149 Affairs Medical Center in White River Junction, Vermont, which waived the requirement for  
51  
52 150 informed consent. We followed the Strengthening the Reporting of Observational Studies in  
53  
54 151 Epidemiology reporting guideline.  
55  
56  
57  
58  
59  
60

1  
2  
3 152 Patient and Public Involvement statement  
4  
5

6 153 Neither patients nor the public were involved in this study.  
7  
8

9 154 *Data Source*  
10

11 155 We used electronic medical records and COVID-19 laboratory test data from the VHA Corporate  
12  
13 156 Data Warehouse (CDW) to define infection irrespective of symptoms. The VHA CDW holds  
14  
15  
16 157 electronic medical records for about 9 million U.S. Veterans who use the VHA's network of  
17  
18 158 1,293 health care facilities, including hospitals and outpatient clinics [24]. Using CDC variant  
19  
20 159 tracking data [13], we presumed positive tests during January 2022 were Omicron SARS-CoV-2  
21  
22 160 infections and those positive during November 2021 were Delta. Because December 2021  
23  
24 161 represented an overlap of both variants, we excluded positive tests from that month. As Medicare  
25  
26 162 claims were available only up to August 2021, we used them to find COVID-19 diagnoses,  
27  
28 163 vaccinations, and hospitalizations prior to the study period to exclude patients with prior history  
29  
30 164 of COVID-19 and to augment our vaccination records. Since this population of Veterans was  
31  
32 165 largely over 65 years old, we supplemented CDW data with available Medicare data as Veterans  
33  
34 166 may use Medicare to provide healthcare services even if we found frequent users of VHA. We  
35  
36 167 used VHA CDW records to determine date of death and hospitalizations with admission  
37  
38 168 diagnosis related to COVID-19.  
39  
40  
41  
42

43 169 *Study Design*  
44

45  
46 170 To estimate VE against infection, we conducted a matched test negative case-control study.  
47

48  
49 171 Inclusion criteria: 1) Tested at the VHA for SARS-CoV-2 via antigen or PCR; 2) Enrolled in  
50  
51 172 VHA benefits for 2+ years and a Veteran; 3) Met VHA use criteria of 1 inpatient or 2 outpatient  
52  
53 173 visits during the 2 years prior to study period; 4) Resident of U.S. state or DC 5) Exposed in the  
54  
55 174 community (excluded those hospitalized >1 day prior to test); 6) 18 years old or older at the time  
56  
57  
58  
59  
60

1  
2  
3 175 of the test with valid demographic data (excluded those with missing sex or date-of-birth); 7)  
4  
5 176 COVID-19 naïve (excluded those with a positive test or diagnosis code in VHA or Medicare  
6  
7 177 prior to the study period); 8) Veterans with positive tests during the study period were included  
8  
9 178 as cases; 9) Veterans with negative tests during the study period were included as controls; 10)  
10  
11 179 The test occurred during the study period (November 2021 (Delta predominance) or January  
12  
13 180 2022 (Omicron predominance)); 11) Classifiable vaccination status: 0 to 3 doses of mRNA  
14  
15 181 vaccination. Exclusions: 1) Negative tests taken within 10 days following a positive test; and 2)  
16  
17 182 Veterans vaccinated with Janssen vaccine.  
18  
19  
20  
21

22 183 We matched each case (positive tests) with up to 4 controls (negative tests) based on Health and  
23  
24 184 Human Service (HHS) geographic region and SARS-CoV-2 laboratory tests within 3 weeks of  
25  
26 185 the case specimen collection date as both are measures of local disease burden. Demographic  
27  
28 186 characteristics of the matched population were described by reporting the frequency and  
29  
30 187 proportion for categorical variables and the mean (SD) for continuous variables. Standardized  
31  
32 188 mean differences (SMD) [25] were used to describe differences in characteristics between cases  
33  
34 189 and controls. For estimated VE against hospitalization and death, we utilized a matched case-  
35  
36 190 control design. Depending on the analysis, cases were those hospitalized or were those who died  
37  
38 191 within 30 days of the positive COVID-19 test. Controls were those not hospitalized or who did  
39  
40 192 not die within 30 days of their SARS-CoV-2 tests, irrespective of test results. Any patient with  
41  
42 193 dual Medicare-VHA enrolment who had a claim for COVID-related hospitalization prior to the  
43  
44 194 study period was already excluded, thus ineligible to be a control. Hospitalizations were defined  
45  
46 195 as a hospital admission diagnosis related to COVID-19 after a positive SARS-CoV-2 test.  
47  
48 196 To better inform our interpretation of VE against hospitalization and mortality in the two time  
49  
50 197 periods, we conducted a sub-analysis in which we assessed VE against COVID-related  
51  
52  
53  
54  
55  
56  
57  
58  
59  
60

1  
2  
3 198 hospitalization and death among those already infected, restricting our hospitalization and  
4  
5 199 mortality analysis to patients with a positive test. Cases were defined as before, and controls  
6  
7  
8 200 were those who were not hospitalized or who did not die within 30 days of a positive test. We  
9  
10 201 also compared average length-of-stay (LOS) and rates of intensive care unit (ICU) admission  
11  
12 202 among those hospitalized in the Delta and Omicron periods.

### 14 203 *Exposure*

16 204 We defined 2-dose vaccination as receipt of two doses of an mRNA COVID-19 vaccine, and  
17  
18  
19 205 booster vaccination as receipt of a third doses of an mRNA vaccine (about 95% of mRNA 3<sup>rd</sup>  
20  
21 206 doses occurred approximately six months after a 2<sup>nd</sup> dose). We designated exposure to the two-  
22  
23  
24 207 dose regimen or a booster from 14 days following vaccination, excluding events in days 0-13.  
25  
26 208 We designated patients as unvaccinated if they had no record of vaccination in either VHA CDW  
27  
28 209 or in Medicare.

### 30 210 *Statistical Analysis*

32  
33 211 We used conditional logistic regression to calculate odds ratios (ORs) with 95% confidence  
34  
35 212 intervals (CI) for the association between positive SARS-CoV-2 testing and 2 or 3 doses of  
36  
37 213 mRNA COVID-19 vaccine during Delta and Omicron periods. In the model, we included  
38  
39 214 number of mRNA vaccine doses (2 or 3) as the primary explanatory variable, an indicator  
40  
41 215 variable for SARS-CoV-2 presumed variant (Delta or Omicron) based on test date, and their  
42  
43  
44 216 interaction terms. We estimated the association between SARS-CoV-2 infections and number of  
45  
46 217 mRNA vaccine doses by the OR, adjusting for age (continuous), race, rurality, VHA benefits  
47  
48 218 priority, and comorbid conditions (cancer, congestive heart failure, hypertension,  
49  
50  
51 219 immunocompromising conditions, obesity, and diabetes). Confounders were determined based  
52  
53  
54 220 on prior study [9] [11] and known factors associated with SARS-CoV-2 [26]. We also used



221 conditional logistic regression to analyze VE against hospitalizations and death. Due to sample  
222 size and scope of the study, we did not analyze one dose of mRNA vaccine.

223 Severity of disease was determined by average length of stay (LOS) in days between admission  
224 date and discharge date for overall COVID-19-related hospitalizations and average LOS in an  
225 intensive care unit (ICU) during a hospitalization related to COVID-19.

226 All tests were two-tailed, and we chose 0.05 as the level of statistical significance. We performed  
227 data analysis using SAS 9.4 (SAS Institute, Cary, North Carolina).

## 228 RESULTS

### 229 *Study Population*

230 In November 2021 (Delta period) there were 4,134 positive SARS-CoV-2 tests (cases), and  
231 170,316 negative tests (controls) (Figure 1). After matching, 4,134 cases and 16,536 controls  
232 remained (see Table 1 for baseline characteristics); 2,300 (56%) cases and 3,951 (24%) controls  
233 were unvaccinated at the time of testing. In January 2022 (Omicron period) there were 32,983  
234 positive tests (cases) and 263,780 negative tests (controls). After matching, 32,983 cases and  
235 126,363 controls remained. At the time of testing, 13,153 (40%) cases and 29,110 (23%) controls  
236 remained unvaccinated. During both periods, cases tended to have a lower CCI score and to be  
237 younger than controls. Patients included in this study were largely 65 years or older (94,447,  
238 52%), male (158,395, 88%), and non-Hispanic white (105,437, 59%). The cases in both the  
239 Delta and Omicron periods had similar proportions of comorbid conditions at baseline, while the  
240 controls during the Delta period had a slightly higher proportion of comorbid conditions (Table  
241 1). Reasons for testing and presence of symptoms from a random sample of individuals who  
242 presented for testing are displayed in Table S1.

243 Table 1. Baseline Characteristics of Matched Study Subjects

|                                                                                                                                                                          | Delta       |                 |                  | Omicron      |                  |                  |
|--------------------------------------------------------------------------------------------------------------------------------------------------------------------------|-------------|-----------------|------------------|--------------|------------------|------------------|
|                                                                                                                                                                          | Case (4134) | Control (16536) | SMD <sup>^</sup> | Case (32983) | Control (126363) | SMD <sup>^</sup> |
| Number of mRNA vaccines, No. (%)                                                                                                                                         |             |                 |                  |              |                  |                  |
| 0                                                                                                                                                                        | 2300 (56)   | 3951 (24)       | 68.6             | 13153 (40)   | 29110 (23)       | 36.9             |
| 1                                                                                                                                                                        | 66 (2)      | 329 (2)         | 3.0              | 887 (3)      | 2900 (2)         | 2.5              |
| 2                                                                                                                                                                        | 1627 (39)   | 8035 (49)       | 18.7             | 11983 (36)   | 35400 (28)       | 17.9             |
| 3                                                                                                                                                                        | 141 (3)     | 4221 (26)       | 66.2             | 6960 (21)    | 58953 (47)       | 56.1             |
| Vaccine manufacturer for first dose, No. (%)                                                                                                                             |             |                 |                  |              |                  |                  |
| Moderna                                                                                                                                                                  | 1057 (26)   | 7120 (43)       | 37.5             | 9935 (30)    | 50921 (40)       | 21.4             |
| Pfizer-BioNTech                                                                                                                                                          | 777 (19)    | 5465 (33)       | 33.0             | 9890 (30)    | 46283 (37)       | 14.1             |
| Janssen                                                                                                                                                                  | 0           | 0               | 0                | <11          | 49 (0)           | S                |
| No Vaccine Recorded                                                                                                                                                      | 2300 (56)   | 3951 (24)       | 68.6             | 13153 (40)   | 29110 (23)       | 36.9             |
| Age, years, No. (%)                                                                                                                                                      |             |                 |                  |              |                  |                  |
| 18 to 44                                                                                                                                                                 | 904 (22)    | 114 (1)         | 71.0             | 7828 (24)    | 8966 (7)         | 47.4             |
| 45 to 64                                                                                                                                                                 | 1417 (34)   | 6091 (37)       | 5.3              | 12884 (39)   | 47365 (37)       | 3.2              |
| 65 to 74                                                                                                                                                                 | 1110 (27)   | 6381 (39)       | 25.2             | 7738 (23)    | 41715 (33)       | 21.3             |
| 75 to 84                                                                                                                                                                 | 537 (13)    | 2871 (17)       | 12.2             | 3584 (11)    | 21345 (17)       | 17.5             |
| 85+                                                                                                                                                                      | 166 (4)     | 1079 (7)        | 11.2             | 949 (3)      | 6972 (6)         | 13.2             |
| Race/Ethnicity, No. (%)                                                                                                                                                  |             |                 |                  |              |                  |                  |
| Black, non-Hispanic                                                                                                                                                      | 494 (12)    | 4636 (28)       | 41.1             | 8523 (26)    | 37049 (29)       | 7.8              |
| Hispanic, any race                                                                                                                                                       | 193 (5)     | 601 (4)         | 5.2              | 1973 (6)     | 7425 (6)         | 0.4              |
| White, non-Hispanic                                                                                                                                                      | 3193 (77)   | 10139 (61)      | 35.0             | 20038 (61)   | 72067 (57)       | 7.6              |
| other                                                                                                                                                                    | 254 (6)     | 1160 (7)        | 3.5              | 2449 (7)     | 9822 (8)         | 1.3              |
| Sex, No. (%)                                                                                                                                                             |             |                 |                  |              |                  |                  |
| Female                                                                                                                                                                   | 420 (10)    | 1656 (10)       | 0.5              | 4419 (13)    | 15126 (12)       | 4.3              |
| Male                                                                                                                                                                     | 3714 (90)   | 14880 (90)      | 0.5              | 28564 (87)   | 111237 (88)      | 4.3              |
| Quan's CCI                                                                                                                                                               |             |                 |                  |              |                  |                  |
| Mean (SD)                                                                                                                                                                | 0.8 (1.5)   | 1.6 (2.1)       | 44.2             | 0.8 (1.5)    | 1.3 (1.9)        | 31.8             |
| Median (Q1-Q3)                                                                                                                                                           | 0 (0-1)     | 1 (0-2)         |                  | 0 (0-1)      | 1 (0-2)          |                  |
| Comorbid conditions                                                                                                                                                      |             |                 |                  |              |                  |                  |
| Cancer                                                                                                                                                                   | 180 (4)     | 1296 (8)        | 14.6             | 1387 (4)     | 8542 (7)         | 11.2             |
| Congestive heart failure                                                                                                                                                 | 202 (5)     | 1574 (10)       | 18.0             | 1420 (4)     | 9495 (8)         | 13.6             |
| Hypertension                                                                                                                                                             | 1314 (32)   | 7783 (47)       | 31.7             | 10333 (31)   | 53387 (42)       | 22.8             |
| Obesity                                                                                                                                                                  | 391 (9)     | 1770 (11)       | 4.1              | 2851 (9)     | 12452 (10)       | 4.2              |
| Diabetes without complications                                                                                                                                           | 608 (15)    | 2941 (18)       | 8.4              | 4529 (14)    | 21207 (17)       | 8.5              |
| Diabetes with complications                                                                                                                                              | 279 (7)     | 2230 (13)       | 22.5             | 2075 (6)     | 13970 (11)       | 17.0             |
| Immunocompromising conditions                                                                                                                                            | 463 (11)    | 3229 (20)       | 23.2             | 3464 (11)    | 20904 (17)       | 17.7             |
| Abbreviations: Quan's CCI, Charlson comorbidity index, Quan's version, S, suppressed due to small numbers, SD, standard deviation, Q1-Q3, quartiles 1 to 3 <sup>26</sup> |             |                 |                  |              |                  |                  |
| See Supplemental Table 1 (Young-Xu et al.) <sup>1</sup> for definitions of variables in this table                                                                       |             |                 |                  |              |                  |                  |
| <sup>^</sup> Standardized mean difference of 10 or greater was used to identify imbalance between cases and controls <sup>27</sup>                                       |             |                 |                  |              |                  |                  |

244 *Vaccine Effectiveness against infection*

245 For those with 2-dose mRNA vaccine, VE was 54% (95% CI, 50 to 57) for Delta and 12% (95%  
 246 CI, 10 to 15) for Omicron. VE for those who received an mRNA vaccine booster was 90% (95%  
 247 CI, 88 to 92) in the Delta period and 64% (95% CI, 63 to 65) in the Omicron period (Table 2).  
 248 For the Delta period, the median time from the 2<sup>nd</sup> dose to the SARS-CoV-2 test date was 241  
 249 days and 35 days from the 3<sup>rd</sup> dose. As is expected this median time from 2<sup>nd</sup> dose of  
 250 vaccination increased for the Omicron period to 289 days and 72 days from the 3<sup>rd</sup> dose.

Table 2. Estimated Vaccine Effectiveness Against Laboratory Confirmed SARS-CoV-2 Infection by Dose and Variant

| Variant                                                                                                                                                                                                                                                                                                                                                                                                  | Number of doses versus unvaccinated                  | Adjusted VE (95% CI) <sup>^</sup> |
|----------------------------------------------------------------------------------------------------------------------------------------------------------------------------------------------------------------------------------------------------------------------------------------------------------------------------------------------------------------------------------------------------------|------------------------------------------------------|-----------------------------------|
| Omicron                                                                                                                                                                                                                                                                                                                                                                                                  | 2 <sup>nd</sup> dose (cases: 24136, controls: 79953) | 12% (10, 15)                      |
| Omicron                                                                                                                                                                                                                                                                                                                                                                                                  | 3 <sup>rd</sup> dose (cases: 19839, controls: 69182) | 64% (63, 65)                      |
| Delta                                                                                                                                                                                                                                                                                                                                                                                                    | 2 <sup>nd</sup> dose (cases: 3878, controls: 15576)  | 54% (50, 57)                      |
| Delta                                                                                                                                                                                                                                                                                                                                                                                                    | 3 <sup>rd</sup> dose (cases: 2342, controls: 9395)   | 90% (88, 92)                      |
| Above numbers exclude Johnson & Johnson's Janssen vaccines as of the date of the Johnson & Johnson's Janssen vaccine. 2 <sup>nd</sup> and 3 <sup>rd</sup> doses are for mRNA vaccines compared to no vaccination in the indicated variant predominant period beginning 14 days after vaccination. Tests occurring in 0-13 days after vaccination were excluded.                                          |                                                      |                                   |
| <sup>^</sup> Cases and controls were matched 1:4 on HHS region and date. The adjusted variables include the following: age (continuous), body mass index (missing, normal <26, overweight/obese ≥26), cancer, congestive heart failure, chronic kidney disease, chronic obstructive pulmonary disease, diabetes mellitus, hypertension, immunocompromised, priority level, race/ethnicity, and rurality. |                                                      |                                   |

251 *Hospitalization and Death*

252 VE against COVID-related hospitalization for those who received 2-dose mRNA vaccine was  
 253 75% (95% CI, 69 to 80) in the Delta period and 63% (95% CI, 58 to 67) in the Omicron period  
 254 (Table 3). VE against COVID-related hospitalization for those who received an mRNA vaccine

booster was 94% (95% CI, 90 to 96) in the Delta period, higher than the 2-dose VE, and 89% (95% CI, 88 to 91) in the Omicron period (Table 3). In a sub-analysis restricted to those with a positive COVID-19 test in the study period, we evaluated VE against progression to hospitalization among the infected only, we found that VE for booster against COVID-related hospitalization was 53% (95% CI, 12 to 75) in the Delta period – not statistically different from the 2-dose VE, and 78% (95% CI, 74 to 81) in the Omicron period – almost twice higher than the 2-dose VE (Table S2). Among Omicron-associated hospitalizations (regardless of vaccination status), the length of stay (LOS) averaged 6.5 days (95% CI, 6.2 to 6.7 days), compared to 7.2 days (95% CI, 6.6 to 7.8) among Delta-associated hospitalizations. 11.3% (95% CI, 8.8 to 13.8%) of hospitalizations during the Delta period resulted in ICU admission; in contrast, 8.3% (95% CI, 7.2 to 9.5%) of COVID-related hospitalizations during the Omicron period resulted in ICU admission (Figure 2).

Table 3. Estimated Vaccine Effectiveness Against COVID-19-related Hospitalization and Death by Dose and Variant

| Variant                                                                                                                                                                                                                                                                                                                                                         | Number of doses versus unvaccinated                | Adjusted VE (95% CI)^ |
|-----------------------------------------------------------------------------------------------------------------------------------------------------------------------------------------------------------------------------------------------------------------------------------------------------------------------------------------------------------------|----------------------------------------------------|-----------------------|
| Hospitalization                                                                                                                                                                                                                                                                                                                                                 |                                                    |                       |
| Omicron                                                                                                                                                                                                                                                                                                                                                         | 2 <sup>nd</sup> dose (cases: 1746, controls: 6964) | 63% (58, 67)          |
| Omicron                                                                                                                                                                                                                                                                                                                                                         | 3 <sup>rd</sup> dose (cases: 1403, controls: 5611) | 89% (88, 91)          |
| Delta                                                                                                                                                                                                                                                                                                                                                           | 2 <sup>nd</sup> dose (cases: 570, controls: 2282)  | 75% (69, 80)          |
| Delta                                                                                                                                                                                                                                                                                                                                                           | 3 <sup>rd</sup> dose (cases: 381, controls: 1532)  | 94% (90, 96)          |
| Death                                                                                                                                                                                                                                                                                                                                                           |                                                    |                       |
| Omicron                                                                                                                                                                                                                                                                                                                                                         | 2 <sup>nd</sup> dose (cases: 322, controls: 1285)  | 77% (67, 83)          |
| Omicron                                                                                                                                                                                                                                                                                                                                                         | 3 <sup>rd</sup> dose (cases: 267, controls: 1066)  | 94% (90, 96)          |
| Delta                                                                                                                                                                                                                                                                                                                                                           | 2 <sup>nd</sup> dose (cases: 109, controls: 431)   | 92% (83, 96)          |
| Delta                                                                                                                                                                                                                                                                                                                                                           | 3 <sup>rd</sup> dose (cases: 89, controls: 354)    | 96% (87, 99)          |
| Above numbers exclude Johnson & Johnson's Janssen vaccines as of the date of the Johnson & Johnson's Janssen vaccine. 2 <sup>nd</sup> and 3 <sup>rd</sup> doses are for mRNA vaccines compared to no vaccination in the indicated variant predominant period beginning 14 days after vaccination. Tests occurring in 0-13 days after vaccination were excluded. |                                                    |                       |

^Cases and controls were matched 1:4 (max) without replacement on HHS and lab test date within three weeks. The adjusted variables include the following: age (continuous), body mass index (missing, normal <26, overweight ≥26), cancer, congestive heart failure, chronic kidney disease, chronic obstructive pulmonary disease, diabetes mellitus, hypertension, immunocompromised, priority level, race/ethnicity, and rurality.

267 For those who received 2 doses of mRNA vaccines, VE against death was 92% (95% CI, 85 to  
268 97) during Delta period and 77% (95% CI, 67 to 83) during Omicron period. VE against death  
269 for those who received an mRNA vaccine booster was 96% (95% CI, 87 to 99), and no different  
270 from the 2-dose VE, during the Delta period, and was 94% (95% CI, 90 to 96), higher than the 2-  
271 dose VE, during the Omicron period.

## 272 **DISCUSSION**

273 Our study shows that Veterans who received an mRNA vaccine booster were highly protected  
274 against COVID-related outcomes, particularly hospitalization and death, during both the Delta  
275 and Omicron periods. These findings largely align with other VE studies of Omicron [19] [20]  
276 [21] [23] [22] [27]. Also, among Veterans tested positive for COVID-19, irrespective of  
277 vaccination, those infected during the Omicron period were less likely than those infected during  
278 the Delta period to be hospitalized and, if hospitalized, had shorter lengths of stay and lower  
279 likelihood of ICU admission.

280 We found that the booster dose significantly increased protection against infection, regardless of  
281 symptoms, providing higher protection than the 2-dose regimen during both variant predominant  
282 periods. However, VE of the booster does against Delta was consistently higher than that against  
283 Omicron. These results were generally aligned with published findings. Early results from  
284 Southern California [20] showed that booster doses improved VE against infection when  
285 compared to 2-doses during both the Delta and Omicron periods. Similarly, a study from Israel

1  
2  
3 286 focusing specifically on the Pfizer mRNA vaccine during the Delta period, estimated that a  
4  
5 287 booster vaccination reduced the rate of confirmed infection as compared to those who did not  
6  
7  
8 288 receive a booster, bringing the VE up to that reported against the Alpha variant [28].  
9

10  
11 289 Although we found moderate VE against hospitalization after 2-dose vaccination, the booster  
12  
13 290 dose significantly improved VE against hospitalization during the Delta and Omicron periods.  
14  
15 291 Estimated VE of the booster dose against mortality was high during both Delta and Omicron  
16  
17 292 periods. These estimates of high VE against mortality resembled the reduced risk of mortality  
18  
19 293 reported elsewhere in the U.S. [29]  
20  
21  
22

23 294 A study from South Africa that focused on two-doses of the Pfizer vaccine found an estimated  
24  
25 295 VE against hospitalization of 93% (95% CI, 90 to 94) during the Delta period and 70% (95% CI,  
26  
27 296 62 to 76) during the Omicron period [19]. While we found a similar drop in effectiveness from  
28  
29 297 the Delta to the Omicron period, our VE estimates were lower for both periods. Waning  
30  
31 298 protection over time and differences in populations may contribute to the discrepancy in our  
32  
33 299 findings.  
34  
35  
36  
37

38 300 Our supplementary cases-only analysis showed that the booster vaccination was still highly  
39  
40 301 effective against hospitalization among vaccine breakthrough cases in both the Omicron and  
41  
42 302 Delta periods, with a higher point estimate for the Omicron period (Table S2). This is consistent  
43  
44 303 with a study from the U.K. showing reduced risk of hospitalization among those infected with  
45  
46 304 the Omicron variant compared to the Delta variant [30].  
47  
48  
49

50 305 Our results highlight the value of booster doses for protection against infection and, more  
51  
52 306 importantly, against hospitalization and death. They also revealed distinctive features of the two  
53  
54 307 variants, and lower severity of illness for the Omicron variant as compared to the Delta variant.  
55  
56  
57  
58  
59  
60

## 308 **STRENGTHS AND LIMITATIONS**

309 Strengths of this study include a large, diverse population and near real-time access to medical  
310 records. The VHA population offers insight into populations often underrepresented in US  
311 studies: racial minorities with a wide range of socio-economic backgrounds. Also, the VHA  
312 Veteran population is older (47% above 65) [31], sicker [32], and predominantly male (90%  
313 male) [31].

314 Although data on symptomatic versus asymptomatic infection and reasons for SARS-CoV-2  
315 testing were infrequently recorded, in a random sample of Veterans who tested positive and had  
316 a detailed record, about a quarter reported no symptoms. Possible misclassification of  
317 vaccination status and missing hospitalization records are of concerns because Veterans could go  
318 elsewhere for vaccination and hospitalization. For Veterans enrolled in Medicare, we checked  
319 records through August 2021 (latest available Medicare data) for COVID-19 vaccination,  
320 diagnoses, and related hospitalizations. We also limited the study population to Veterans who  
321 routinely sought care at the VHA to minimize misclassification. We assessed patient vaccination  
322 status as of November 2021 and January 2022. Other studies, including one of our own, have  
323 examined waning mRNA vaccine effectiveness against infection [11] [33] [34], so we did not  
324 labor further on this topic. Nevertheless, Veterans with underlying conditions and health seeking  
325 behaviors may have been vaccinated earlier, thus increased their likelihood of having reduced  
326 immunity.

327 Sequencing data were not available for individual SARS-CoV-2 laboratory tests, so we defined  
328 variant periods based on estimated variant proportions in the U.S. by the CDC. To reduce  
329 misclassification, we excluded December 2021 when Delta and Omicron variants shared  
330 dominance, analyzing November 2021 (when Delta was almost 100% dominant) and January

1  
2  
3 331 2022 (when Omicron was 90%-100% dominant) separately [13]. In a future study we plan to use  
4  
5 332 individual sequencing data after they become available in the VHA.  
6  
7

## 8 333 **CONCLUSION**

9  
10 334 In November 2021, the CDC expanded the booster recommendation to everyone 18 and older 6  
11  
12 335 months after their second mRNA dose or 2 months after receiving Johnson & Johnson's Janssen  
13  
14 336 vaccine.<sup>7</sup> At that time, 2-dose mRNA vaccine effectiveness among our study population of VHA  
15  
16 337 Veterans were 54%, 75%, and 92% against COVID-19 infection, hospitalization, and death due  
17  
18 338 to the Delta variant, respectively. Our findings indicate that mRNA vaccine boosters were very  
19  
20 339 effective against severe COVID-related outcomes during both Delta and Omicron periods among  
21  
22 340 a predominantly male population. Moreover, the booster vaccination reduced the likelihood of  
23  
24 341 hospitalization among infected patients. Overall, the mRNA vaccine boosters provided a level of  
25  
26 342 protection against Omicron like that of 2-dose against Delta, with VE at 64%, 89%, and 94%  
27  
28 343 against infection, hospitalization, and death, respectively. We can witness the impact of the  
29  
30 344 mRNA vaccine boosters as case numbers continue to drop and the surge of the Omicron variant  
31  
32 345 abates across the United States.  
33  
34  
35  
36  
37  
38

39 346 Figure Legend/Caption

40 347 Figure 1. Attrition

41 348 Figure 2. Average Hospital Length-of-Stay and Intensive Care Unit Use during Delta and

42  
43  
44  
45 349 Omicron Periods  
46  
47  
48  
49  
50  
51  
52  
53  
54  
55  
56  
57  
58  
59  
60



350

**Ethics Approval Statement**

The study (Reference number: 1593089) was approved by the institutional review board (IRB) of the department of Veterans Affairs Medical Center in White River Junction, Vermont, which waived the requirement for informed consent due to impracticality and low risk of the study.

**Contributorship:** YYX, HSI, CK, and VCM conceptualized and designed the study. YYX, EIP, GMZ, JS, ASB, and CK conducted data analysis. YYX, GMZ, HIS, CK, EIP, JS, ASB, MH, DOB, MCR, STB, and VCM reviewed titles, abstract, and full-text papers for eligibility. YYX and GZ drafted the paper, and YYX, GMZ, HIS, CK, EIP, JS, ASB, MH, DOB, MCR, STB, and VCM reviewed drafts and approved the final version. YYX is the guarantor of the paper.

**Disclaimer:** This article represents the authors' best judgement and should not bind or obligate the VA, FDA, or any other institution.

**Competing interests:** YYX, EIP, GMZ, JS, ASB, and CK acknowledge having received funding from Pfizer for other research projects other than this one.

**Funding:** This project was funded by both the U.S. Food and Drug Administration and the U.S. Department of Veterans Affairs Office of Rural Health.

**Data availability statement:** Data may be obtained from a third part and are not publicly available. The data that support the findings of this study are available upon reasonable request from the respective health data stewardship entities.

359

370

## 371 REFERENCES

372

373 1. World Health Organization Director-General's opening remarks at the media briefing on COVID-

374 19 - 11 March 2020. [news briefing] 2020; Available from: [https://www.who.int/director-](https://www.who.int/director-general/speeches/detail/who-director-general-s-opening-remarks-at-the-media-briefing-on-covid-19--11-march-2020)  
375 [general/speeches/detail/who-director-general-s-opening-remarks-at-the-media-briefing-on-](https://www.who.int/director-general/speeches/detail/who-director-general-s-opening-remarks-at-the-media-briefing-on-covid-19--11-march-2020)  
376 [covid-19--11-march-2020](https://www.who.int/director-general/speeches/detail/who-director-general-s-opening-remarks-at-the-media-briefing-on-covid-19--11-march-2020).377 2. U.S. Food and Drug Administration FDA takes key action in fight against COVID-19 by issuing  
378 Emergency Use Authorization for first COVID-19 vaccine. 2020 December 11, 2020 [cited 2022  
379 June 14, 2022]; Available from: [https://www.fda.gov/news-events/press-announcements/fda-](https://www.fda.gov/news-events/press-announcements/fda-takes-key-action-fight-against-covid-19-issuing-emergency-use-authorization-first-covid-19)  
380 [takes-key-action-fight-against-covid-19-issuing-emergency-use-authorization-first-covid-19](https://www.fda.gov/news-events/press-announcements/fda-takes-key-action-fight-against-covid-19-issuing-emergency-use-authorization-first-covid-19).381 3. U.S. Food and Drug Administration FDA takes additional action in fight against COVID-19 by  
382 issuing Emergency Use Authorization for second COVID-19 vaccine. 2020 December 18, 2020  
383 [cited 2022 June 14, 2022]; Available from: [https://www.fda.gov/news-events/press-](https://www.fda.gov/news-events/press-announcements/fda-takes-additional-action-fight-against-covid-19-issuing-emergency-use-authorization-second-covid)  
384 [announcements/fda-takes-additional-action-fight-against-covid-19-issuing-emergency-use-](https://www.fda.gov/news-events/press-announcements/fda-takes-additional-action-fight-against-covid-19-issuing-emergency-use-authorization-second-covid)  
385 [authorization-second-covid](https://www.fda.gov/news-events/press-announcements/fda-takes-additional-action-fight-against-covid-19-issuing-emergency-use-authorization-second-covid).386 4. Bajema, K.L., et al., *Comparative Effectiveness and Antibody Responses to Moderna and Pfizer-*  
387 *BioNTech COVID-19 Vaccines among Hospitalized Veterans - Five Veterans Affairs Medical*  
388 *Centers, United States, February 1-September 30, 2021*. MMWR Morb Mortal Wkly Rep, 2021.  
389 **70**(49): p. 1700-1705.390 5. Bajema, K.L., et al., *Effectiveness of COVID-19 mRNA Vaccines Against COVID-19-Associated*  
391 *Hospitalization - Five Veterans Affairs Medical Centers, United States, February 1-August 6,*  
392 *2021*. MMWR Morb Mortal Wkly Rep, 2021. **70**(37): p. 1294-1299.393 6. Tenforde, M.W., et al., *Effectiveness of Pfizer-BioNTech and Moderna Vaccines Against COVID-19*  
394 *Among Hospitalized Adults Aged ≥65 Years - United States, January-March 2021*. MMWR  
395 Morb Mortal Wkly Rep, 2021. **70**(18): p. 674-679.396 7. Butt, A.A., et al., *SARS-CoV-2 Vaccine Effectiveness in a High-Risk National Population in a Real-*  
397 *World Setting*. Ann Intern Med, 2021. **174**(10): p. 1404-1408.398 8. Thompson, M.G., et al., *Interim Estimates of Vaccine Effectiveness of BNT162b2 and mRNA-1273*  
399 *COVID-19 Vaccines in Preventing SARS-CoV-2 Infection Among Health Care Personnel, First*  
400 *Responders, and Other Essential and Frontline Workers - Eight U.S. Locations, December 2020-*  
401 *March 2021*. MMWR Morb Mortal Wkly Rep, 2021. **70**(13): p. 495-500.402 9. Young-Xu, Y., et al., *Coverage and Estimated Effectiveness of mRNA COVID-19 Vaccines Among*  
403 *US Veterans*. JAMA Netw Open, 2021. **4**(10): p. e2128391.404 10. Bianchi, F.P., et al., *Medium-to-Long-Term Immunogenicity of BNT162b2 mRNA COVID-19*  
405 *Vaccine: A Retrospective Cohort Study*. Vaccines (Basel), 2022. **10**(3).406 11. Young-Xu, Y., et al., *Estimated Effectiveness of COVID-19 Messenger RNA Vaccination Against*  
407 *SARS-CoV-2 Infection Among Older Male Veterans Health Administration Enrollees, January to*  
408 *September 2021*. JAMA Netw Open, 2021. **4**(12): p. e2138975.409 12. Caroline Korves, H.S.I., Jeremy Smith, Gabrielle M. Zwain, Ethan I. Powell, Abirami Balajee,  
410 Kathryn Ryder, Yinong Young-Xu, *Relative effectiveness of booster vs. 2-dose mRNA Covid-19*  
411 *vaccination in the Veterans Health Administration: Self-controlled risk interval analysis*. 2022:  
412 medRxiv.413 13. U.S. Centers for Disease Control and Prevention COVID Data Tracker Variant Proportions. 2021  
414 [cited 2022 January 31, 2022]; Available from: [https://covid.cdc.gov/covid-data-](https://covid.cdc.gov/covid-data-tracker/#variant-proportions)  
415 [tracker/#variant-proportions](https://covid.cdc.gov/covid-data-tracker/#variant-proportions).

- 1  
2  
3 416 14. U.S. Centers for Disease Control and Prevention What you need to know about variants 2022  
4 417 [cited 2022 June 14, 2022]; Available from: [https://www.cdc.gov/coronavirus/2019-ncov/variants/about-variants.html?CDC\\_AA\\_refVal=https%3A%2F%2Fwww.cdc.gov%2Fcoronavirus%2F2019-ncov%2Fvariants%2Fdelta-variant.html](https://www.cdc.gov/coronavirus/2019-ncov/variants/about-variants.html?CDC_AA_refVal=https%3A%2F%2Fwww.cdc.gov%2Fcoronavirus%2F2019-ncov%2Fvariants%2Fdelta-variant.html).  
5 418  
6 419  
7 420  
8 421 15. Calloway, E., *Omicron likely to weaken COVID vaccine protection*, in *Nature.com*. 2021, Springer  
9 422 Nature Limited: [www.nature.com/articles/d41586-021-03672-3](http://www.nature.com/articles/d41586-021-03672-3). p. 367-368.  
10 423 16. U.S. Centers for Disease Control and Prevention CDC statement on ACIP booster  
11 424 recommendations. [News Release] 2021 [cited 2022 February 24, 2022]; Available from:  
12 425 <https://www.cdc.gov/media/releases/2021/p0924-booster-recommendations-.html>.  
13 426 17. U.S. Centers for Disease Control and Prevention COVID-19 Vaccines: COVID-19 Vaccine Boosters.  
14 427 [website] 2022 May 24, 2022 [cited 2022 June 15, 2022]; Available from:  
15 428 <https://www.cdc.gov/coronavirus/2019-ncov/vaccines/booster-shot.html>.  
16 429 18. Department of Veteran Affairs COVID-19 National Summary. 2022 [cited 2022 March 16, 2022];  
17 430 Available from: <https://www.accesstocare.va.gov/Healthcare/COVID19NationalSummary>.  
18 431 19. Collie, S., et al., *Effectiveness of BNT162b2 Vaccine against Omicron Variant in South Africa*. *N*  
19 432 *Engl J Med*, 2022. **386**(5): p. 494-496.  
20 433 20. Tseng, H.F., et al., *Effectiveness of mRNA-1273 against SARS-CoV-2 Omicron and Delta variants*.  
21 434 *Nat Med*, 2022. **28**(5): p. 1063-1071.  
22 435 21. Willett, B.J., et al., *The hyper-transmissible SARS-CoV-2 Omicron variant exhibits significant*  
23 436 *antigenic change, vaccine escape and a switch in cell entry mechanism*. medRxiv, 2022: p.  
24 437 2022.01.03.21268111.  
25 438 22. Andrews, N., et al., *Effectiveness of COVID-19 vaccines against the Omicron (B.1.1.529) variant*  
26 439 *of concern*. medRxiv, 2021: p. 2021.12.14.21267615.  
27 440 23. Thompson, M.G., et al., *Effectiveness of a Third Dose of mRNA Vaccines Against COVID-19-*  
28 441 *Associated Emergency Department and Urgent Care Encounters and Hospitalizations Among*  
29 442 *Adults During Periods of Delta and Omicron Variant Predominance - VISION Network, 10 States,*  
30 443 *August 2021-January 2022*. *MMWR Morb Mortal Wkly Rep*, 2022. **71**(4): p. 139-145.  
31 444 24. U.S. Department of Veterans Affairs: Veterans Health Administration. 2022 [cited 2022 March  
32 445 16, 2022]; Available from: <https://www.va.gov/health/>.  
33 446 25. Austin, P.C., *Balance diagnostics for comparing the distribution of baseline covariates between*  
34 447 *treatment groups in propensity-score matched samples*. *Stat Med*, 2009. **28**(25): p. 3083-107.  
35 448 26. Izurieta, H.S., et al., *Natural History of Coronavirus Disease 2019: Risk Factors for*  
36 449 *Hospitalizations and Deaths Among >26 Million US Medicare Beneficiaries*. *J Infect Dis*, 2021.  
37 450 **223**(6): p. 945-956.  
38 451 27. UK Health Security Agency: SARS-CoV-2 variants of concern and variants under investigation in  
39 452 *England Technical briefing 33*. 2021, UK Health Security Agency:  
40 453 [https://assets.publishing.service.gov.uk/government/uploads/system/uploads/attachment\\_data/file/1043807/technical-briefing-33.pdf](https://assets.publishing.service.gov.uk/government/uploads/system/uploads/attachment_data/file/1043807/technical-briefing-33.pdf).  
41 454  
42 455 28. Bar-On, Y.M., et al., *Protection of BNT162b2 Vaccine Booster against Covid-19 in Israel*. *N Engl J*  
43 456 *Med*, 2021. **385**(15): p. 1393-1400.  
44 457 29. Johnson, A.G., et al., *COVID-19 Incidence and Death Rates Among Unvaccinated and Fully*  
45 458 *Vaccinated Adults with and Without Booster Doses During Periods of Delta and Omicron Variant*  
46 459 *Emergence - 25 U.S. Jurisdictions, April 4-December 25, 2021*. *MMWR Morb Mortal Wkly Rep*,  
47 460 2022. **71**(4): p. 132-138.  
48 461 30. Ferguson, N., Ghani, Azra, Hinsley, Wes, Volz, Erik, *Report 50 - Hospitalisation risk for Omicron*  
49 462 *cases in England*, J.I. MRC Centre for Global Infectious Disease Analysis, Imperial College London,  
50 463 Editor. 2021: Imperial College London.

- 1  
2  
3 464 31. U.S. Department of Veteran Affairs, National Center for Veterans Analysis and Statistics, *Veteran*  
4 465 *Population*. 2022 [cited 2022 February 8, 2022]; Available from:  
5 466 [https://www.va.gov/vetdata/veteran\\_population.asp](https://www.va.gov/vetdata/veteran_population.asp).  
6 467 32. Rogers, W.H., et al., *Comparing the health status of VA and non-VA ambulatory patients: the*  
7 468 *veterans' health and medical outcomes studies*. *J Ambul Care Manage*, 2004. **27**(3): p. 249-62.  
8 469 33. Chemaitelly, H., et al., *Waning of BNT162b2 Vaccine Protection against SARS-CoV-2 Infection in*  
9 470 *Qatar*. *N Engl J Med*, 2021. **385**(24): p. e83.  
10 471 34. Lin, D.-Y., et al., *Effectiveness of Covid-19 Vaccines over a 9-Month Period in North Carolina*. *New*  
11 472 *England Journal of Medicine*, 2022. **386**(10): p. 933-941.  
12  
13  
14 473

15  
16  
17  
18  
19  
20  
21  
22  
23  
24  
25  
26  
27  
28  
29  
30  
31  
32  
33  
34  
35  
36  
37  
38  
39  
40  
41  
42  
43  
44  
45  
46  
47  
48  
49  
50  
51  
52  
53  
54  
55  
56  
57  
58  
59  
60

For peer review only

Figure 1. Attrition

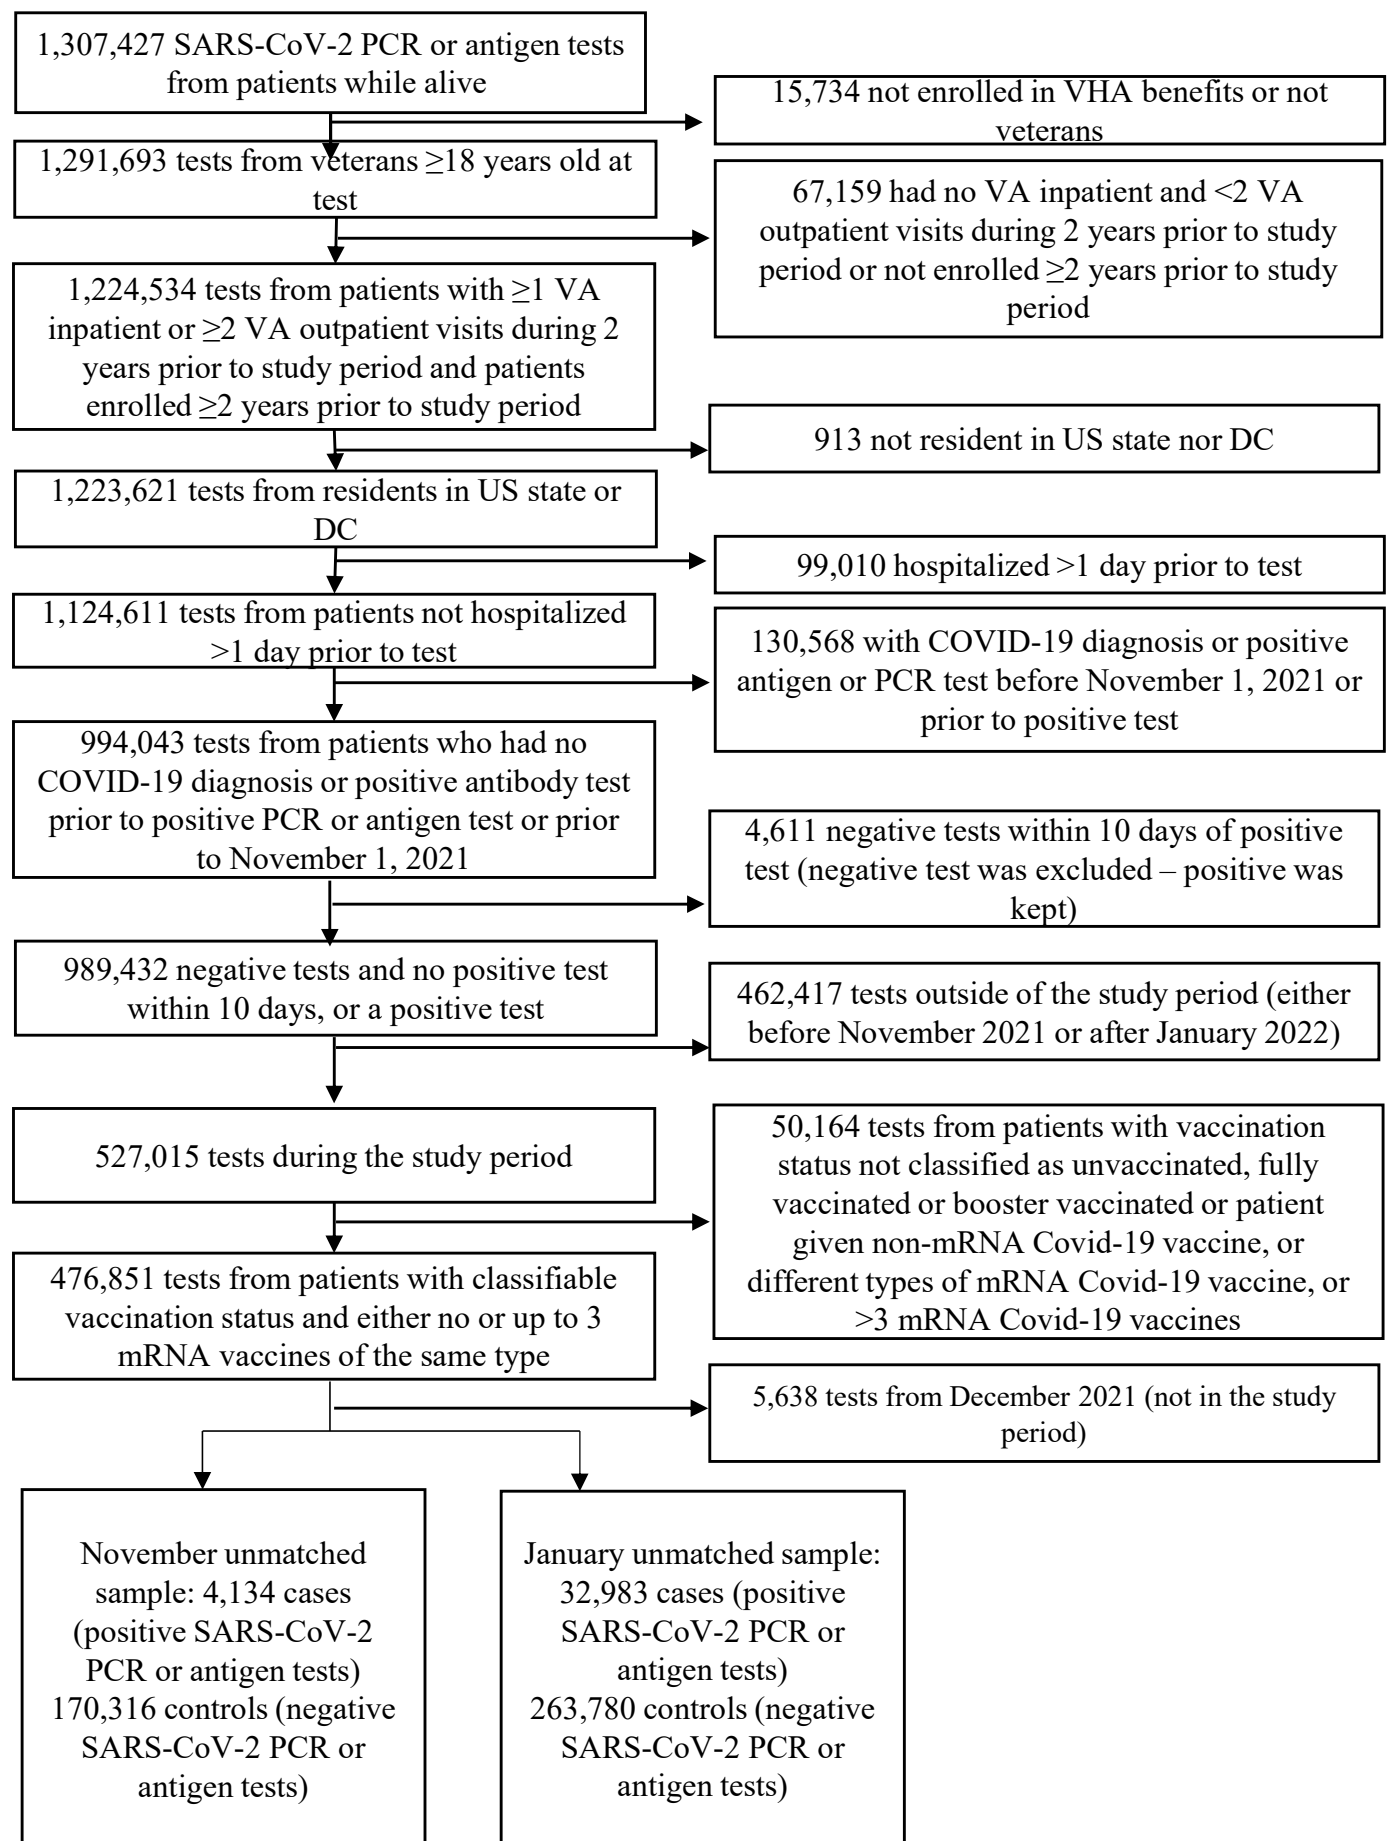

Figure 2. Average Hospital Length-of-Stay\* and Intensive Care Unit Use during Delta and Omicron Periods

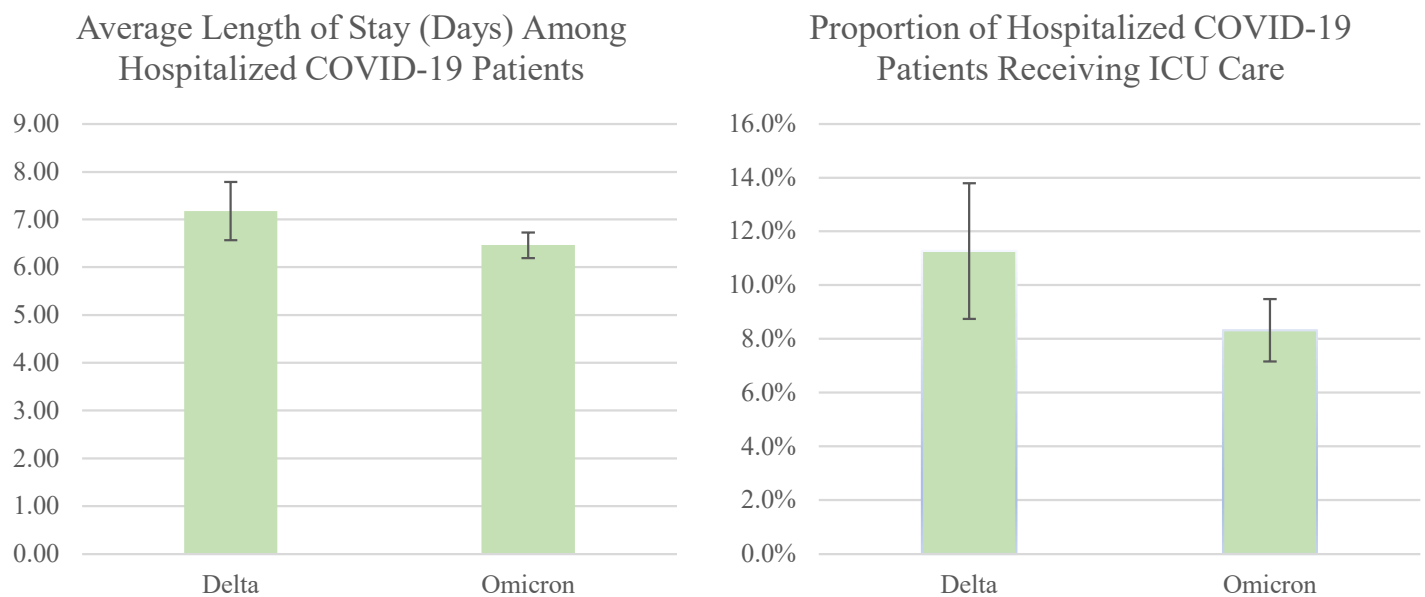

\* Number of days between admission and discharge dates

1  
2  
3  
4  
5  
6  
7  
8  
9  
10  
11  
12  
13  
14  
15  
16  
17  
18  
19  
20  
21  
22  
23  
24  
25  
26  
27  
28  
29  
30  
31  
32  
33  
34  
35  
36  
37  
38  
39  
40  
41  
42  
43  
44  
45  
46  
47  
48  
49  
50  
51  
52  
53  
54  
55  
56  
57  
58  
59  
60

Supplemental Materials Legend

1. Table S1. Reasons for Testing and Symptoms
2. Table S2. Estimated Vaccine Effectiveness Against COVID-19-related Hospitalization and Death Among Patients with a Positive Test
3. List S3. of Inclusion and Exclusion Criteria

For peer review only

Table S1. Reasons for Testing and Symptoms in A Random Sample of COVID-19 Tests

|                                                                                                                                      | Frequency | Percent |
|--------------------------------------------------------------------------------------------------------------------------------------|-----------|---------|
| Reason for Testing Recorded (n=1421)                                                                                                 |           |         |
| Exposure                                                                                                                             | 574       | 40%     |
| Screening                                                                                                                            | 847       | 60%     |
| Positive Tests (n=606)                                                                                                               |           |         |
| Asymptomatic                                                                                                                         | 160       | 26%     |
| Symptomatic                                                                                                                          | 346       | 57%     |
| Unknown                                                                                                                              | 100       | 17%     |
| Total Sample (n=10000)                                                                                                               |           |         |
| Records indicating asymptomatic/symptomatic/reason for testing                                                                       | 1958      | 20%     |
| Unknown                                                                                                                              | 8042      | 80%     |
| Exposure: ICD-10-CM code Z20.822; Screening: ICD-10-CM code Z11.52; up to 1 day before and including the date of the SARS-CoV-2 test |           |         |

Table S2. Estimated Vaccine Effectiveness Against COVID-19-related Hospitalization and Death Among Patients with a Positive Test by Dose and Variant

| Variant                                                                                                                                                                                                                                                                                                                                                                                         | Number of doses versus unvaccinated                | Adjusted VE (95% CI)^ |
|-------------------------------------------------------------------------------------------------------------------------------------------------------------------------------------------------------------------------------------------------------------------------------------------------------------------------------------------------------------------------------------------------|----------------------------------------------------|-----------------------|
| Hospitalization                                                                                                                                                                                                                                                                                                                                                                                 |                                                    |                       |
| Omicron                                                                                                                                                                                                                                                                                                                                                                                         | 2 <sup>nd</sup> dose (cases:1746, controls: 6715)  | 55% (49, 60)          |
| Omicron                                                                                                                                                                                                                                                                                                                                                                                         | 3 <sup>rd</sup> dose (cases: 1403, controls: 5209) | 78% (74, 81)          |
| Delta                                                                                                                                                                                                                                                                                                                                                                                           | 2 <sup>nd</sup> dose (cases: 570, controls: 1912)  | 59% (48, 68)          |
| Delta                                                                                                                                                                                                                                                                                                                                                                                           | 3 <sup>rd</sup> dose (cases: 381, controls: 986)   | 53% (12, 75)          |
| Death                                                                                                                                                                                                                                                                                                                                                                                           |                                                    |                       |
| Omicron                                                                                                                                                                                                                                                                                                                                                                                         | 2 <sup>nd</sup> dose (cases: 322, controls: 1286)  | 61% (47, 72)          |
| Omicron                                                                                                                                                                                                                                                                                                                                                                                         | 3 <sup>rd</sup> dose (cases: 267, controls: 1062)  | 85% (77, 91)          |
| Delta                                                                                                                                                                                                                                                                                                                                                                                           | 2 <sup>nd</sup> dose (cases: 109, controls: 434)   | 81% (67, 89)          |
| Delta                                                                                                                                                                                                                                                                                                                                                                                           | 3 <sup>rd</sup> dose(cases: 89, controls: 352)     | 62% (-25, 88)         |
| Above numbers exclude Johnson & Johnson's Janssen vaccines as of the date of the Johnson & Johnson's Janssen vaccine. 2 <sup>nd</sup> and 3 <sup>rd</sup> doses are for mRNA vaccines compared to no vaccination in the indicated period beginning 14 days after vaccination. Tests occurring in 0-13 days after vaccination were excluded.                                                     |                                                    |                       |
| ^Cases and controls were matched 1:4 (max) without replacement on HHS and lab test date within three weeks. The adjusted variables include the following: age (continuous), body mass index, cancer, congestive heart failure, chronic kidney disease, chronic obstructive pulmonary disease, diabetes mellitus, hypertension, immunocompromised, priority level, race/ethnicity, and rurality. |                                                    |                       |



1  
2  
3 List 1. Inclusion and Exclusion Criteria  
4

5 Inclusion criteria:  
6

- 7 ○ Tested at the VHA for SARS-CoV-2 via antigen or PCR  
8  
9 ○ Enrolled in VHA benefits for 2+ years and a Veteran  
10  
11 ○ Met VHA use criteria of 1 inpatient or 2 outpatient visits during the 2  
12 years prior to study period  
13  
14 ○ Resident of U.S. state or DC  
15  
16 ○ Exposed in the community (excluded those hospitalized >1 day prior to  
17 test)  
18  
19 ○ 18 years old or older at the time of the test with valid demographic data  
20 (excluded those with missing sex or date-of-birth)  
21  
22 ○ COVID-19 naïve (excluded those with a positive test or diagnosis code in  
23 VHA or Medicare prior to the study period)  
24  
25 ○ Veterans with positive tests during the study period were included as cases  
26  
27 ○ Veterans with negative tests during the study period were included as  
28 controls  
29  
30 ○ The test occurred during the study period (November 2021 (Delta  
31 predominance) or January 2022 (Omicron predominance))  
32  
33 ○ Classifiable vaccination status:  
34  
35     ▪ 0 to 3 doses of mRNA vaccination  
36

37 Exclusions:  
38

- 39 ○ Negative tests taken within 10 days following a positive test  
40  
41 ○ Veterans vaccinated with Janssen vaccine  
42  
43  
44  
45  
46  
47  
48  
49  
50  
51  
52  
53  
54  
55  
56  
57  
58  
59  
60

## STROBE Statement—checklist of items that should be included in reports of observational studies

|                           | Item No. | Recommendation                                                                                                                                                                                                                                                                                                                                                                                                                                                         | Page No. | Relevant text from manuscript |
|---------------------------|----------|------------------------------------------------------------------------------------------------------------------------------------------------------------------------------------------------------------------------------------------------------------------------------------------------------------------------------------------------------------------------------------------------------------------------------------------------------------------------|----------|-------------------------------|
| <b>Title and abstract</b> | 1        | (a) Indicate the study's design with a commonly used term in the title or the abstract                                                                                                                                                                                                                                                                                                                                                                                 | 1        | Lines 1-2                     |
|                           |          | (b) Provide in the abstract an informative and balanced summary of what was done and what was found                                                                                                                                                                                                                                                                                                                                                                    | 3-4      | Lines 64-88                   |
| <b>Introduction</b>       |          |                                                                                                                                                                                                                                                                                                                                                                                                                                                                        |          |                               |
| Background/rationale      | 2        | Explain the scientific background and rationale for the investigation being reported                                                                                                                                                                                                                                                                                                                                                                                   | 6-7      | Lines 119-130                 |
| Objectives                | 3        | State specific objectives, including any prespecified hypotheses                                                                                                                                                                                                                                                                                                                                                                                                       | 7        | Lines 142-147                 |
| <b>Methods</b>            |          |                                                                                                                                                                                                                                                                                                                                                                                                                                                                        |          |                               |
| Study design              | 4        | Present key elements of study design early in the paper                                                                                                                                                                                                                                                                                                                                                                                                                | 8        | Lines 170-171                 |
| Setting                   | 5        | Describe the setting, locations, and relevant dates, including periods of recruitment, exposure, follow-up, and data collection                                                                                                                                                                                                                                                                                                                                        | 8        | Lines 155-168                 |
| Participants              | 6        | (a) <i>Cohort study</i> —Give the eligibility criteria, and the sources and methods of selection of participants. Describe methods of follow-up<br><i>Case-control study</i> —Give the eligibility criteria, and the sources and methods of case ascertainment and control selection. Give the rationale for the choice of cases and controls<br><i>Cross-sectional study</i> —Give the eligibility criteria, and the sources and methods of selection of participants | 8-9      | Lines 172-183                 |
|                           |          | (b) <i>Cohort study</i> —For matched studies, give matching criteria and number of exposed and unexposed<br><i>Case-control study</i> —For matched studies, give matching criteria and the number of controls per case                                                                                                                                                                                                                                                 | 9-10     | Lines 184-203                 |
| Variables                 | 7        | Clearly define all outcomes, exposures, predictors, potential confounders, and effect modifiers. Give diagnostic criteria, if applicable                                                                                                                                                                                                                                                                                                                               | 10-11    | Lines 205- 223                |

1  
2  
3  
4  
5  
6  
7  
8  
9  
10  
11  
12  
13  
14  
15  
16  
17  
18  
19  
20  
21  
22  
23  
24  
25  
26  
27  
28  
29  
30  
31  
32  
33  
34  
35  
36  
37  
38  
39  
40  
41  
42  
43  
44  
45  
46

|                              |    |                                                                                                                                                                                      |     |                        |
|------------------------------|----|--------------------------------------------------------------------------------------------------------------------------------------------------------------------------------------|-----|------------------------|
| Data sources/<br>measurement | 8* | For each variable of interest, give sources of data and details of methods of assessment (measurement). Describe comparability of assessment methods if there is more than one group | 8-9 | Lines 155-164, 186-190 |
| Bias                         | 9  | Describe any efforts to address potential sources of bias                                                                                                                            | 8   | Lines 164-168          |
| Study size                   | 10 | Explain how the study size was arrived at                                                                                                                                            |     | Figure 1               |

Continued on next page

For peer review only

|                        |     |                                                                                                                                                                                                                                                                                                           |             |                                                  |
|------------------------|-----|-----------------------------------------------------------------------------------------------------------------------------------------------------------------------------------------------------------------------------------------------------------------------------------------------------------|-------------|--------------------------------------------------|
| Quantitative variables | 11  | Explain how quantitative variables were handled in the analyses. If applicable, describe which groupings were chosen and why                                                                                                                                                                              | 10-11       | Lines 217-220                                    |
| Statistical methods    | 12  | (a) Describe all statistical methods, including those used to control for confounding                                                                                                                                                                                                                     | 10-11       | Lines 212-221, lines 227-228                     |
|                        |     | (b) Describe any methods used to examine subgroups and interactions                                                                                                                                                                                                                                       | 11          | Lines 221-223                                    |
|                        |     | (c) Explain how missing data were addressed                                                                                                                                                                                                                                                               | 9           | Lines 175-176, Table 2, Table 3                  |
|                        |     | (d) <i>Cohort study</i> —If applicable, explain how loss to follow-up was addressed<br><i>Case-control study</i> —If applicable, explain how matching of cases and controls was addressed<br><i>Cross-sectional study</i> —If applicable, describe analytical methods taking account of sampling strategy | 8-9         | Lines 170-171, lines 184-186                     |
|                        |     | (e) Describe any sensitivity analyses                                                                                                                                                                                                                                                                     | 10          | lines 197-203                                    |
| <b>Results</b>         |     |                                                                                                                                                                                                                                                                                                           |             |                                                  |
| Participants           | 13* | (a) Report numbers of individuals at each stage of study—eg numbers potentially eligible, examined for eligibility, confirmed eligible, included in the study, completing follow-up, and analysed                                                                                                         | 11          | See Figure 1 Attrition<br>Lines 231-236          |
|                        |     | (b) Give reasons for non-participation at each stage                                                                                                                                                                                                                                                      |             | See Figure 1 Attrition                           |
|                        |     | (c) Consider use of a flow diagram                                                                                                                                                                                                                                                                        |             | See Figure 1 Attrition                           |
| Descriptive data       | 14* | (a) Give characteristics of study participants (eg demographic, clinical, social) and information on exposures and potential confounders                                                                                                                                                                  | 11-12       | See Table 1<br>Lines 236-242                     |
|                        |     | (b) Indicate number of participants with missing data for each variable of interest                                                                                                                                                                                                                       |             | Table 1                                          |
|                        |     | (c) <i>Cohort study</i> —Summarise follow-up time (eg, average and total amount)                                                                                                                                                                                                                          |             | N/A                                              |
| Outcome data           | 15* | <i>Cohort study</i> —Report numbers of outcome events or summary measures over time                                                                                                                                                                                                                       |             | N/A                                              |
|                        |     | <i>Case-control study</i> —Report numbers in each exposure category, or summary measures of exposure                                                                                                                                                                                                      |             | See Table 1, Table 2, Table 3                    |
|                        |     | <i>Cross-sectional study</i> —Report numbers of outcome events or summary measures                                                                                                                                                                                                                        |             | N/A                                              |
| Main results           | 16  | (a) Give unadjusted estimates and, if applicable, confounder-adjusted estimates and their precision (eg, 95% confidence interval). Make clear which confounders were adjusted for and why they were included                                                                                              | 10-11<br>12 | Lines 217-220<br>See Tables 2-3<br>Lines 245-247 |
|                        |     | (b) Report category boundaries when continuous variables were categorized                                                                                                                                                                                                                                 |             | Table 2-3                                        |
|                        |     | (c) If relevant, consider translating estimates of relative risk into absolute risk for a meaningful time period                                                                                                                                                                                          |             | N/A                                              |

Continued on next page

|                          |    |                                                                                                                                                                            |    |                               |
|--------------------------|----|----------------------------------------------------------------------------------------------------------------------------------------------------------------------------|----|-------------------------------|
| Other analyses           | 17 | Report other analyses done—eg analyses of subgroups and interactions, and sensitivity analyses                                                                             |    | Table 3 Table S2 and Figure 2 |
| <b>Discussion</b>        |    |                                                                                                                                                                            |    |                               |
| Key results              | 18 | Summarise key results with reference to study objectives                                                                                                                   | 13 | Lines 273-279                 |
| Limitations              | 19 | Discuss limitations of the study, taking into account sources of potential bias or imprecision. Discuss both direction and magnitude of any potential bias                 | 15 | Lines 314-332                 |
|                          |    |                                                                                                                                                                            | 5  | Lines 98-104                  |
| Interpretation           | 20 | Give a cautious overall interpretation of results considering objectives, limitations, multiplicity of analyses, results from similar studies, and other relevant evidence | 14 | Lines 305-307                 |
| Generalisability         | 21 | Discuss the generalisability (external validity) of the study results                                                                                                      | 4  | Lines 84-88                   |
|                          |    |                                                                                                                                                                            | 15 | Lines 311-313                 |
| <b>Other information</b> |    |                                                                                                                                                                            |    |                               |
| Funding                  | 22 | Give the source of funding and the role of the funders for the present study and, if applicable, for the original study on which the present article is based              | 17 | Lines 360-361                 |

\*Give information separately for cases and controls in case-control studies and, if applicable, for exposed and unexposed groups in cohort and cross-sectional studies.

**Note:** An Explanation and Elaboration article discusses each checklist item and gives methodological background and published examples of transparent reporting. The STROBE checklist is best used in conjunction with this article (freely available on the Web sites of PLoS Medicine at <http://www.plosmedicine.org/>, Annals of Internal Medicine at <http://www.annals.org/>, and Epidemiology at <http://www.epidem.com/>). Information on the STROBE Initiative is available at [www.strobe-statement.org](http://www.strobe-statement.org).
