# Supplementary material for: Effectiveness of mRNA COVID-19 vaccines against Omicron and Delta variants in a matched test-negative case–control study among US veterans
Source: PubMed Central journal article supplement — BMJ Open. 2022 Aug 2;12(8):e063935. doi: 10.1136/bmjopen-2022-063935 (PMC9352567; doi:10.1136/bmjopen-2022-063935), 2022-08-02
Supplement: bmjopen-2022-063935supp001.pdf [file bmjopen-2022-063935supp001.pdf]

### Supplemental Materials Legend

1. Table S1. Reasons for Testing and Symptoms
2. Table S2. Estimated Vaccine Effectiveness Against COVID-19-related Hospitalization and Death Among Patients with a Positive Test
3. List S3. of Inclusion and Exclusion Criteria

Table S1. Reasons for Testing and Symptoms in A Random Sample of COVID-19 Tests

|                                                                                                                                      | Frequency | Percent |
|--------------------------------------------------------------------------------------------------------------------------------------|-----------|---------|
| Reason for Testing Recorded (n=1421)                                                                                                 |           |         |
| Exposure                                                                                                                             | 574       | 40%     |
| Screening                                                                                                                            | 847       | 60%     |
| Positive Tests (n=606)                                                                                                               |           |         |
| Asymptomatic                                                                                                                         | 160       | 26%     |
| Symptomatic                                                                                                                          | 346       | 57%     |
| Unknown                                                                                                                              | 100       | 17%     |
| Total Sample (n=10000)                                                                                                               |           |         |
| Records indicating asymptomatic/symptomatic/reason for testing                                                                       | 1958      | 20%     |
| Unknown                                                                                                                              | 8042      | 80%     |
| Exposure: ICD-10-CM code Z20.822; Screening: ICD-10-CM code Z11.52; up to 1 day before and including the date of the SARS-CoV-2 test |           |         |

Table S2. Estimated Vaccine Effectiveness Against COVID-19-related Hospitalization and Death Among Patients with a Positive Test by Dose and Variant

| Variant                                                                                                                                                                                                                                                                                                                                                                                         | Number of doses versus unvaccinated                | Adjusted VE (95% CI)^ |
|-------------------------------------------------------------------------------------------------------------------------------------------------------------------------------------------------------------------------------------------------------------------------------------------------------------------------------------------------------------------------------------------------|----------------------------------------------------|-----------------------|
| Hospitalization                                                                                                                                                                                                                                                                                                                                                                                 |                                                    |                       |
| Omicron                                                                                                                                                                                                                                                                                                                                                                                         | 2 <sup>nd</sup> dose (cases: 1746, controls: 6715) | 55% (49, 60)          |
| Omicron                                                                                                                                                                                                                                                                                                                                                                                         | 3 <sup>rd</sup> dose (cases: 1403, controls: 5209) | 78% (74, 81)          |
| Delta                                                                                                                                                                                                                                                                                                                                                                                           | 2 <sup>nd</sup> dose (cases: 570, controls: 1912)  | 59% (48, 68)          |
| Delta                                                                                                                                                                                                                                                                                                                                                                                           | 3 <sup>rd</sup> dose (cases: 381, controls: 986)   | 53% (12, 75)          |
| Death                                                                                                                                                                                                                                                                                                                                                                                           |                                                    |                       |
| Omicron                                                                                                                                                                                                                                                                                                                                                                                         | 2 <sup>nd</sup> dose (cases: 322, controls: 1286)  | 61% (47, 72)          |
| Omicron                                                                                                                                                                                                                                                                                                                                                                                         | 3 <sup>rd</sup> dose (cases: 267, controls: 1062)  | 85% (77, 91)          |
| Delta                                                                                                                                                                                                                                                                                                                                                                                           | 2 <sup>nd</sup> dose (cases: 109, controls: 434)   | 81% (67, 89)          |
| Delta                                                                                                                                                                                                                                                                                                                                                                                           | 3 <sup>rd</sup> dose (cases: 89, controls: 352)    | 62% (-25, 88)         |
| Above numbers exclude Johnson & Johnson's Janssen vaccines as of the date of the Johnson & Johnson's Janssen vaccine. 2 <sup>nd</sup> and 3 <sup>rd</sup> doses are for mRNA vaccines compared to no vaccination in the indicated period beginning 14 days after vaccination. Tests occurring in 0-13 days after vaccination were excluded.                                                     |                                                    |                       |
| ^Cases and controls were matched 1:4 (max) without replacement on HHS and lab test date within three weeks. The adjusted variables include the following: age (continuous), body mass index, cancer, congestive heart failure, chronic kidney disease, chronic obstructive pulmonary disease, diabetes mellitus, hypertension, immunocompromised, priority level, race/ethnicity, and rurality. |                                                    |                       |

## List 1. Inclusion and Exclusion Criteria

### Inclusion criteria:

- Tested at the VHA for SARS-CoV-2 via antigen or PCR
- Enrolled in VHA benefits for 2+ years and a Veteran
- Met VHA use criteria of 1 inpatient or 2 outpatient visits during the 2 years prior to study period
- Resident of U.S. state or DC
- Exposed in the community (excluded those hospitalized >1 day prior to test)
- 18 years old or older at the time of the test with valid demographic data (excluded those with missing sex or date-of-birth)
- COVID-19 naïve (excluded those with a positive test or diagnosis code in VHA or Medicare prior to the study period)
- Veterans with positive tests during the study period were included as cases
- Veterans with negative tests during the study period were included as controls
- The test occurred during the study period (November 2021 (Delta predominance) or January 2022 (Omicron predominance))
- Classifiable vaccination status:
  - 0 to 3 doses of mRNA vaccination

### Exclusions:

- Negative tests taken within 10 days following a positive test
- Veterans vaccinated with Janssen vaccine
